# Supplementary material for: Large Sex Differences in Chicken Behavior and Brain Gene Expression Coincide with Few Differences in Promoter DNA-Methylation
Source: PubMed Central journal article supplement (PMC4004567; doi:10.1371/journal.pone.0096376), 2014-04-29
Supplement: pone.0096376.s002.pdf [file pone.0096376.s002.pdf]

**Table S1.** Significantly differentially expressed probesets in females related to males.

| Affymetrix ID           | Gene name     | Red Junglefowl (RJF) |               | White Leghorn (WL) |               | Best alignments                | Type             |
|-------------------------|---------------|----------------------|---------------|--------------------|---------------|--------------------------------|------------------|
|                         |               | FC                   | p-value (FDR) | FC                 | p-value (FDR) |                                |                  |
| Gga.14796.1.S1_at       | ---           | 3.14                 | <0.0001       | 3.49               | <0.0001       | ---                            | Sign. WL and RJF |
| GgaAffx.25782.2.S1_at   | LOC427010     | 2.38                 | <0.0001       | 2.06               | <0.0001       | chr1:165954820-165965625       | Sign. WL and RJF |
| GgaAffx.25782.2.S1_s_at | ZFR           | 1.09                 | <0.0001       | 0.98               | <0.0001       | chr1:165954820-165965625       | Sign. WL and RJF |
| GgaAffx.25782.3.S1_s_at | LOC427010     | 0.92                 | <0.0001       | 0.95               | <0.0001       | chr1:165973581-165980409       | Sign. WL and RJF |
| GgaAffx.5172.1.S1_at    | LOC425409     | 1.01                 | <0.0001       | 1.06               | <0.0001       | chrUn_random:1118897-1129061   | Sign. WL and RJF |
| GgaAffx.20721.1.S1_s_at | RCJMB04_17o18 | -0.83                | <0.0001       | -0.79              | <0.01         | chrUn_random:15509070-15512734 | Sign. WL and RJF |
| GgaAffx.8764.1.S1_s_at  | RCJMB04_14b4  | -0.81                | <0.0001       | -0.84              | <0.001        | chrUn_random:23438811-23440772 | Sign. WL and RJF |
| GgaAffx.12386.1.S1_at   | RCJMB04_14b4  | -0.80                | <0.001        | -0.84              | <0.001        | chrUn_random:23438894-23441308 | Sign. WL and RJF |
| Gga.11922.1.S1_at       | BTF3          | -0.64                | <0.01         | -0.64              | <0.05         | chrUn_random:31602735-31609298 | Sign. WL and RJF |
| GgaAffx.12965.1.S1_at   | ANKRA2        | -0.82                | <0.0001       | -0.86              | <0.001        | chrUn_random:31620987-31628010 | Sign. WL and RJF |
| GgaAffx.8604.1.S1_at    | UTP15         | -0.72                | <0.001        | -0.68              | <0.05         | chrUn_random:31628268-31638620 | Sign. WL and RJF |
| GgaAffx.12834.1.S1_at   | HNRPK         | 5.80                 | <0.0001       | 5.92               | <0.0001       | chrUn_random:38144124-38164861 | Sign. WL and RJF |
| Gga.19575.1.S1_at       | HNRPK         | 4.69                 | <0.0001       | 5.27               | <0.0001       | chrUn_random:38164764-38165589 | Sign. WL and RJF |
| Gga.19575.1.A1_at       | HNRPK         | 3.44                 | <0.0001       | 3.33               | <0.0001       | chrUn_random:38164764-38165589 | Sign. WL and RJF |
| GgaAffx.11934.1.S1_s_at | DHFR          | -0.63                | <0.01         | -0.63              | <0.05         | chrUn_random:40656761-40673403 | Sign. WL and RJF |
| Gga.2883.1.S1_at        | DHFR          | -0.94                | <0.0001       | -0.78              | <0.01         | chrUn_random:40656761-40674166 | Sign. WL and RJF |
| Gga.3078.1.S1_at        | LOC430910     | 4.54                 | <0.0001       | 5.23               | <0.0001       | chrUn_random:47165755-47173919 | Sign. WL and RJF |
| Gga.11630.2.S1_at       | LOC426615     | 1.63                 | <0.0001       | 1.65               | <0.0001       | chrUn_random:53417660-53427017 | Sign. WL and RJF |
| Gga.11630.2.S1_a_at     | LOC426615     | 0.77                 | <0.001        | 0.70               | <0.01         | chrUn_random:53417660-53427017 | Sign. WL and RJF |
| GgaAffx.25232.1.S1_s_at | GADD45B       | -0.72                | <0.001        | -0.62              | <0.05         | chrUn_random:63869374-63870806 | Sign. WL and RJF |
| GgaAffx.21598.1.S1_s_at | LOC425502     | 5.21                 | <0.0001       | 5.12               | <0.0001       | chrUn_random:8085899-8099453   | Sign. WL and RJF |
| Gga.9791.1.S1_at        | LOC427134     | 1.10                 | <0.0001       | 1.53               | <0.0001       | chrW:120571-127776             | Sign. WL and RJF |
| Gga.15312.1.S1_a_at     | UBAP2         | 1.49                 | <0.0001       | 1.96               | <0.0001       | chrW:72271-94265               | Sign. WL and RJF |
| Gga.12737.1.S1_at       | LOC426031     | 2.05                 | <0.0001       | 1.82               | <0.0001       | chrW_random:281584-292401      | Sign. WL and RJF |
| Gga.14146.1.S1_at       | LOC426031     | 0.92                 | <0.0001       | 0.92               | <0.0001       | chrW_random:292571-327719      | Sign. WL and RJF |
| GgaAffx.20558.1.S1_at   | CHD1          | 4.25                 | <0.0001       | 4.94               | <0.0001       | chrW_random:453596-454479      | Sign. WL and RJF |
| Gga.8463.1.S1_s_at      | CHD1          | 3.60                 | <0.0001       | 3.86               | <0.0001       | chrW_random:453596-454479      | Sign. WL and RJF |
| Gga.7309.1.S1_at        | LOC431003     | 2.29                 | <0.0001       | 2.39               | <0.0001       | chrW_random:468914-502728      | Sign. WL and RJF |
| Gga.9713.2.S1_a_at      | HINTW         | 8.51                 | <0.0001       | 8.49               | <0.0001       | chrW_random:581356-602643      | Sign. WL and RJF |
| Gga.9338.1.S1_at        | HINTW         | 2.03                 | <0.0001       | 1.42               | <0.0001       | chrW_random:591438-603267      | Sign. WL and RJF |
| Gga.1845.1.S1_at        | SPIN1         | 5.32                 | <0.0001       | 5.12               | <0.0001       | chrW_random:67979-154333       | Sign. WL and RJF |
| Gga.16837.1.S1_at       | NIPBL         | 0.81                 | <0.0001       | 0.88               | <0.001        | chrZ:10765084-10779413         | Sign. WL and RJF |
| Gga.1946.1.S1_at        | LOC427440     | -0.89                | <0.0001       | -0.71              | <0.01         | chrZ:10832481-10846719         | Sign. WL and RJF |
| GgaAffx.2307.1.S1_s_at  | NUP155        | -0.78                | <0.001        | -0.84              | <0.001        | chrZ:10903886-10935558         | Sign. WL and RJF |
| GgaAffx.2320.1.S1_at    | WDR70         | -1.07                | <0.0001       | -0.95              | <0.0001       | chrZ:10937343-11080300         | Sign. WL and RJF |
| Gga.16087.1.S1_at       | LOC427191     | -0.88                | <0.0001       | -0.83              | <0.001        | chrZ:12693736-12697319         | Sign. WL and RJF |
| Gga.161.1.S1_at         | SMAD2         | -0.93                | <0.0001       | -0.81              | <0.01         | chrZ:1290955-1331604           | Sign. WL and RJF |
| Gga.463.1.S1_at         | MRPS30        | -0.82                | <0.0001       | -0.93              | <0.0001       | chrZ:13609764-13870784         | Sign. WL and RJF |
| Gga.9572.2.S1_s_at      | MOC52         | -1.11                | <0.0001       | -1.02              | <0.0001       | chrZ:15250981-15256126         | Sign. WL and RJF |
| Gga.12875.1.S1_at       | HDHD2         | -0.82                | <0.0001       | -0.99              | <0.0001       | chrZ:1534850-1541006           | Sign. WL and RJF |
| Gga.3232.1.S1_at        | NDUFS4        | -1.00                | <0.0001       | -0.87              | <0.001        | chrZ:15447712-15474329         | Sign. WL and RJF |
| GgaAffx.11436.1.S1_at   | SKIV2L2       | -0.98                | <0.0001       | -0.86              | <0.001        | chrZ:16102169-16145323         | Sign. WL and RJF |
| Gga.9870.1.S1_s_at      | SKIV2L2       | -0.90                | <0.0001       | -0.88              | <0.001        | chrZ:16110096-16141691         | Sign. WL and RJF |
| Gga.13230.1.S1_s_at     | LOC770222     | -0.61                | <0.05         | -0.76              | <0.01         | chrZ:16820497-16827908         | Sign. WL and RJF |
| Gga.15137.1.S1_at       | LOC769469     | -0.74                | <0.001        | -0.69              | <0.05         | chrZ:17616045-17657651         | Sign. WL and RJF |
| Gga.8219.1.S1_at        | NDUFA12L      | -0.60                | <0.05         | -0.70              | <0.01         | chrZ:18338289-18387063         | Sign. WL and RJF |
| GgaAffx.9351.1.S1_at    | LOC425720     | 0.97                 | <0.0001       | 0.88               | <0.001        | chrZ:18549817-18578697         | Sign. WL and RJF |
| Gga.9720.1.S1_at        | ATPSA1        | -0.63                | <0.01         | -0.62              | <0.05         | chrZ:1940125-1946504           | Sign. WL and RJF |
| GgaAffx.9364.1.S1_at    | SFRS12IP1     | -0.83                | <0.0001       | -0.88              | <0.001        | chrZ:19602295-19604473         | Sign. WL and RJF |
| Gga.12941.1.S1_at       | SDCCAG10      | -0.78                | <0.001        | -0.62              | <0.05         | chrZ:19606909-19700941         | Sign. WL and RJF |
| GgaAffx.9370.1.S1_at    | PPWD1         | -0.80                | <0.001        | -0.66              | <0.05         | chrZ:19982597-19996723         | Sign. WL and RJF |
| GgaAffx.9374.1.S1_s_at  | LOC427165     | -0.75                | <0.001        | -0.73              | <0.01         | chrZ:20018729-20043194         | Sign. WL and RJF |
| Gga.8469.1.S1_at        | SLC30A5       | -0.57                | <0.05         | -0.67              | <0.05         | chrZ:21302704-21303301         | Sign. WL and RJF |
| Gga.9232.1.S1_at        | MRPS36        | -0.82                | <0.0001       | -0.80              | <0.01         | chrZ:21336850-21343473         | Sign. WL and RJF |
| Gga.9685.1.S1_at        | LOC771294     | -0.64                | <0.01         | -0.77              | <0.01         | chrZ:21346549-21368036         | Sign. WL and RJF |
| Gga.13994.1.S1_at       | SCAMP1        | -0.58                | <0.05         | -0.70              | <0.01         | chrZ:22156475-22192177         | Sign. WL and RJF |
| Gga.5865.1.S1_at        | TBCA          | -1.12                | <0.0001       | -0.85              | <0.001        | chrZ:22531889-22564376         | Sign. WL and RJF |
| Gga.12383.1.S1_at       | CRHBP         | -0.85                | <0.0001       | -0.64              | <0.05         | chrZ:22820329-22828750         | Sign. WL and RJF |
| Gga.11441.1.S1_s_at     | TINP1         | -0.76                | <0.001        | -0.72              | <0.01         | chrZ:23675936-23679829         | Sign. WL and RJF |
| GgaAffx.1097.1.S1_at    | SETBP1        | -0.63                | <0.01         | -0.63              | <0.05         | chrZ:2419077-2427279           | Sign. WL and RJF |
| Gga.12029.1.S1_at       | MRPS27        | -0.72                | <0.001        | -0.83              | <0.001        | chrZ:26136678-26183146         | Sign. WL and RJF |
| GgaAffx.12333.1.S1_s_at | RCJMB04_13c10 | -0.58                | <0.05         | -0.63              | <0.05         | chrZ:26477352-26497485         | Sign. WL and RJF |
| Gga.8237.1.S1_a_at      | LOC770630     | 3.71                 | <0.0001       | 3.73               | <0.0001       | chrZ:27961979-27964669         | Sign. WL and RJF |
| Gga.12454.1.S1_at       | RLN3          | 1.72                 | <0.0001       | 1.52               | <0.0001       | chrZ:28156506-28159178         | Sign. WL and RJF |
| Gga.19311.1.S1_s_at     | ST8SIA3       | -0.88                | <0.0001       | -0.86              | <0.001        | chrZ:317061-320461             | Sign. WL and RJF |
| GgaAffx.21830.1.S1_at   | ST8SIA3       | -0.94                | <0.0001       | -0.79              | <0.01         | chrZ:317109-320470             | Sign. WL and RJF |
| Gga.10398.1.S1_at       | RIT2          | -0.59                | <0.05         | -0.62              | <0.05         | chrZ:3240320-3301834           | Sign. WL and RJF |
| GgaAffx.12114.1.S1_at   | RCJMB04_9g9   | -0.75                | <0.001        | -0.91              | <0.001        | chrZ:33363341-33382892         | Sign. WL and RJF |
| GgaAffx.9584.1.S1_at    | ADFP          | -0.75                | <0.001        | -0.77              | <0.01         | chrZ:33391453-33395569         | Sign. WL and RJF |
| Gga.4389.1.S1_a_at      | RPS6          | -0.55                | <0.05         | -0.64              | <0.05         | chrZ:33519934-33523885         | Sign. WL and RJF |
| GgaAffx.9574.1.S1_s_at  | KIAA1797      | -0.75                | <0.001        | -0.76              | <0.01         | chrZ:33964854-34064295         | Sign. WL and RJF |
| Gga.15983.1.S1_s_at     | FXN           | -0.90                | <0.0001       | -0.85              | <0.001        | chrZ:34238873-34249760         | Sign. WL and RJF |
| GgaAffx.12402.1.S1_s_at | RCJMB04_14g12 | -0.70                | <0.01         | -0.75              | <0.01         | chrZ:34629092-34685402         | Sign. WL and RJF |
| GgaAffx.12473.1.S1_at   | ZFAND5        | -0.79                | <0.001        | -0.82              | <0.001        | chrZ:35431237-35446144         | Sign. WL and RJF |
| GgaAffx.12473.1.S1_s_at | ZFAND5        | -0.76                | <0.001        | -0.78              | <0.01         | chrZ:35431237-35446144         | Sign. WL and RJF |
| Gga.4119.1.S1_at        | ALDH1A1       | -0.58                | <0.05         | -0.72              | <0.01         | chrZ:35596867-35649840         | Sign. WL and RJF |
| Gga.19295.1.S1_at       | LOC427259     | -0.61                | <0.05         | -0.99              | <0.0001       | chrZ:36900804-36906630         | Sign. WL and RJF |
| GgaAffx.9663.1.S1_at    | CEP78         | -0.72                | <0.001        | -0.77              | <0.01         | chrZ:37523068-37533365         | Sign. WL and RJF |
| Gga.8770.2.S1_a_at      | C9orf103      | -0.73                | <0.001        | -0.81              | <0.01         | chrZ:39437468-39446503         | Sign. WL and RJF |
| Gga.11444.1.S1_s_at     | C9orf64       | -0.77                | <0.001        | -0.85              | <0.001        | chrZ:39544138-39553136         | Sign. WL and RJF |
| Gga.4811.1.S1_s_at      | ---           | -0.63                | <0.01         | -0.68              | <0.05         | chrZ:39553279-39570110         | Sign. WL and RJF |
| Gga.4811.2.S1_a_at      | HNRNPK        | -0.65                | <0.01         | -0.64              | <0.05         | chrZ:39553830-39562775         | Sign. WL and RJF |
| GgaAffx.13129.1.S1_at   | RMI1          | -0.61                | <0.05         | -0.71              | <0.01         | chrZ:39572877-39576733         | Sign. WL and RJF |
| GgaAffx.7995.2.S1_s_at  | MAK10         | -0.80                | <0.001        | -0.83              | <0.001        | chrZ:40230276-40255024         | Sign. WL and RJF |
| Gga.12971.1.S1_at       | LOC427469     | -0.88                | <0.0001       | -0.79              | <0.01         | chrZ:41469381-41493202         | Sign. WL and RJF |
| Gga.11727.1.S1_at       | LOC427475     | -0.92                | <0.0001       | -0.92              | <0.001        | chrZ:41503837-41523915         | Sign. WL and RJF |
| Gga.11727.3.S1_a_at     | LOC427475     | -0.67                | <0.01         | -0.72              | <0.01         | chrZ:41513555-41513663         | Sign. WL and RJF |
| Gga.4322.1.S1_at        | SPIN1         | -0.76                | <0.001        | -0.74              | <0.01         | chrZ:42620756-42648541         | Sign. WL and RJF |
| Gga.9717.2.S1_s_at      | SECISBP2      | -0.59                | <0.05         | -0.67              | <0.05         | chrZ:42832607-42842833         | Sign. WL and RJF |
| Gga.11726.1.S1_a_at     | GADD45G       | -0.79                | <0.001        | -0.79              | <0.01         | chrZ:43014620-43015472         | Sign. WL and RJF |
| GgaAffx.24208.1.S1_at   | SPTLC1        | -0.80                | <0.001        | -0.74              | <0.01         | chrZ:43939897-43974064         | Sign. WL and RJF |
| Gga.15824.1.S1_at       | LYRM7         | -0.85                | <0.0001       | -0.92              | <0.0001       | chrZ:44154455-44163095         | Sign. WL and RJF |

|                         |               |       |         |       |         |                           |                  |
|-------------------------|---------------|-------|---------|-------|---------|---------------------------|------------------|
| Gga.229.1.S1_at         | HINT1         | -0.67 | <0.01   | -0.75 | <0.01   | chrZ:44169862-44173887    | Sign. WL and RJF |
| GgaAffx.21466.1.S1_s_at | YTHDC2        | -0.90 | <0.0001 | -0.73 | <0.01   | chrZ:44852613-44856184    | Sign. WL and RJF |
| GgaAffx.21466.1.S1_at   | YTHDC2        | -0.71 | <0.01   | -0.73 | <0.01   | chrZ:44852613-44856184    | Sign. WL and RJF |
| Gga.9993.1.S1_at        | SRP19         | -0.81 | <0.0001 | -0.75 | <0.01   | chrZ:45167634-45174888    | Sign. WL and RJF |
| GgaAffx.12320.1.S1_at   | STARD4        | -0.82 | <0.0001 | -0.79 | <0.01   | chrZ:45677855-45686316    | Sign. WL and RJF |
| Gga.15911.1.S1_s_at     | WDR36         | -0.78 | <0.001  | -0.90 | <0.001  | chrZ:45899198-45907703    | Sign. WL and RJF |
| GgaAffx.13113.1.S1_at   | WDR36         | -0.81 | <0.0001 | -0.79 | <0.01   | chrZ:45899205-45932568    | Sign. WL and RJF |
| Gga.19662.1.S1_at       | LOC415615     | -1.18 | <0.0001 | -1.07 | <0.0001 | chrZ:46887905-46892854    | Sign. WL and RJF |
| Gga.2083.1.S1_at        | TXNL1         | -0.87 | <0.0001 | -0.84 | <0.001  | chrZ:476762-491404        | Sign. WL and RJF |
| GgaAffx.9704.1.S1_at    | TMEM157       | -0.78 | <0.001  | -0.95 | <0.0001 | chrZ:49789484-49803691    | Sign. WL and RJF |
| GgaAffx.9739.1.S1_s_at  | RIOK2         | -0.60 | <0.05   | -0.70 | <0.01   | chrZ:50427859-50439732    | Sign. WL and RJF |
| GgaAffx.12693.1.S1_at   | RIOK2         | -0.60 | <0.05   | -0.63 | <0.05   | chrZ:50427859-50439884    | Sign. WL and RJF |
| Gga.4834.2.S1_at        | RCJMB04_33p3  | -0.91 | <0.0001 | -0.87 | <0.001  | chrZ:50949567-50964982    | Sign. WL and RJF |
| GgaAffx.13170.1.S1_s_at | RCJMB04_33p3  | -0.75 | <0.001  | -0.66 | <0.05   | chrZ:50949592-50965043    | Sign. WL and RJF |
| Gga.4834.3.S1_at        | RCJMB04_33p3  | -0.84 | <0.0001 | -0.78 | <0.01   | chrZ:50964178-50965041    | Sign. WL and RJF |
| GgaAffx.24658.1.S1_at   | PIGG          | -0.81 | <0.0001 | -0.97 | <0.0001 | chrZ:52129738-52212984    | Sign. WL and RJF |
| Gga.15345.1.S1_s_at     | TMEM175       | -0.74 | <0.001  | -0.81 | <0.01   | chrZ:52357608-52364156    | Sign. WL and RJF |
| Gga.8503.1.S1_at        | NIPSNAP3A     | -0.76 | <0.001  | -0.78 | <0.01   | chrZ:53588271-53597988    | Sign. WL and RJF |
| Gga.11483.1.S1_at       | FSD1L         | -0.69 | <0.01   | -0.90 | <0.001  | chrZ:53895493-53920158    | Sign. WL and RJF |
| GgaAffx.24485.1.S1_s_at | RCJMB04_11e18 | -0.84 | <0.0001 | -0.66 | <0.05   | chrZ:55885794-55898342    | Sign. WL and RJF |
| Gga.1140.1.S1_at        | RCJMB04_11e18 | -0.89 | <0.0001 | -0.90 | <0.001  | chrZ:55892268-55899679    | Sign. WL and RJF |
| GgaAffx.12297.1.S1_s_at | ARSK          | -1.12 | <0.0001 | -1.09 | <0.0001 | chrZ:56304344-56315471    | Sign. WL and RJF |
| GgaAffx.9286.1.S1_at    | KIAA0372      | -0.74 | <0.001  | -0.75 | <0.01   | chrZ:56334524-56357555    | Sign. WL and RJF |
| Gga.19460.1.S1_at       | ANKRD32       | -0.93 | <0.0001 | -0.98 | <0.0001 | chrZ:56699869-56707501    | Sign. WL and RJF |
| GgaAffx.12343.1.S1_s_at | C5orf21       | -0.77 | <0.001  | -0.83 | <0.001  | chrZ:56992246-57259077    | Sign. WL and RJF |
| Gga.6910.1.A1_at        | RCJMB04_38d18 | -0.60 | <0.05   | -0.62 | <0.05   | chrZ:58551595-58552197    | Sign. WL and RJF |
| Gga.9278.1.S1_at        | CETN3         | -0.89 | <0.0001 | -0.87 | <0.001  | chrZ:58564876-58581550    | Sign. WL and RJF |
| Gga.9802.1.S1_at        | CCNH          | -0.83 | <0.0001 | -0.70 | <0.01   | chrZ:59652375-59662244    | Sign. WL and RJF |
| Gga.11839.1.S1_s_at     | CCNH          | -0.92 | <0.0001 | -0.80 | <0.01   | chrZ:59652426-59661610    | Sign. WL and RJF |
| Gga.14265.1.S1_at       | RASA1         | -0.78 | <0.001  | -0.75 | <0.01   | chrZ:59664414-59664606    | Sign. WL and RJF |
| Gga.6171.2.S1_at        | COX7C         | -0.77 | <0.001  | -0.88 | <0.001  | chrZ:59900915-59904126    | Sign. WL and RJF |
| GgaAffx.24733.1.S1_s_at | XRCC4         | -0.70 | <0.01   | -0.67 | <0.05   | chrZ:61443250-61535260    | Sign. WL and RJF |
| Gga.11793.1.S1_at       | ATG10         | -0.81 | <0.0001 | -0.75 | <0.01   | chrZ:62040471-62124175    | Sign. WL and RJF |
| GgaAffx.9938.1.S1_at    | LOC427318     | -0.79 | <0.001  | -0.89 | <0.001  | chrZ:62614319-62667651    | Sign. WL and RJF |
| GgaAffx.3134.1.S1_at    | RCJMB04_1f9   | -0.93 | <0.0001 | -0.68 | <0.05   | chrZ:62772410-62773050    | Sign. WL and RJF |
| GgaAffx.11764.1.S1_at   | RCJMB04_5a23  | -0.79 | <0.001  | -0.72 | <0.01   | chrZ:63651117-63671625    | Sign. WL and RJF |
| GgaAffx.9904.1.S1_s_at  | RCJMB04_5a23  | -0.77 | <0.001  | -0.68 | <0.05   | chrZ:63651457-63669020    | Sign. WL and RJF |
| GgaAffx.11916.1.S1_s_at | MRPL50        | -0.97 | <0.0001 | -0.95 | <0.0001 | chrZ:63710371-63711148    | Sign. WL and RJF |
| GgaAffx.12705.1.S1_s_at | C9orf80       | -0.84 | <0.0001 | -0.77 | <0.01   | chrZ:64463284-64474293    | Sign. WL and RJF |
| Gga.2433.1.S1_at        | ---           | -0.87 | <0.0001 | -0.70 | <0.01   | chrZ:64567064-64579646    | Sign. WL and RJF |
| GgaAffx.25482.1.S1_at   | C18orf10      | -0.79 | <0.001  | -0.91 | <0.001  | chrZ:6624235-6647674      | Sign. WL and RJF |
| GgaAffx.1170.1.S1_at    | PLAA          | -0.83 | <0.0001 | -0.75 | <0.01   | chrZ:66790625-66807684    | Sign. WL and RJF |
| Gga.12675.1.S1_at       | LOC427367     | -0.62 | <0.01   | -0.79 | <0.01   | chrZ:66808017-66841141    | Sign. WL and RJF |
| GgaAffx.12938.13.S1_at  | UBE2R2        | -0.58 | <0.05   | -0.64 | <0.05   | chrZ:6816941-6872776      | Sign. WL and RJF |
| Gga.9488.1.S1_at        | APTX          | -0.70 | <0.01   | -0.84 | <0.001  | chrZ:68661014-68669891    | Sign. WL and RJF |
| Gga.3310.1.S1_at        | XPA           | -0.76 | <0.001  | -0.85 | <0.001  | chrZ:68836469-68837258    | Sign. WL and RJF |
| Gga.2614.1.A1_at        | TMOD1         | -0.62 | <0.01   | -0.86 | <0.001  | chrZ:68867405-68883975    | Sign. WL and RJF |
| Gga.3546.1.S1_at        | HSD17B4       | -0.81 | <0.0001 | -0.80 | <0.01   | chrZ:69621720-69678124    | Sign. WL and RJF |
| GgaAffx.12060.1.S1_at   | COMMD10       | -0.68 | <0.01   | -0.78 | <0.01   | chrZ:70838334-70934606    | Sign. WL and RJF |
| GgaAffx.1544.1.S1_s_at  | COMMD10       | -0.79 | <0.001  | -0.71 | <0.01   | chrZ:70838829-70934394    | Sign. WL and RJF |
| Gga.9200.1.S1_s_at      | AP3S1         | -0.58 | <0.05   | -0.71 | <0.01   | chrZ:71017173-71044186    | Sign. WL and RJF |
| Gga.12541.1.S1_at       | NUDT2         | -0.90 | <0.0001 | -0.97 | <0.0001 | chrZ:7103206-7109726      | Sign. WL and RJF |
| GgaAffx.13180.1.S1_s_at | MTAP          | -0.79 | <0.001  | -0.85 | <0.001  | chrZ:71968345-71996016    | Sign. WL and RJF |
| Gga.19885.1.S1_at       | CCDC112       | -0.78 | <0.001  | -0.99 | <0.0001 | chrZ:72191743-72201153    | Sign. WL and RJF |
| Gga.11454.1.S1_at       | ALDH7A1       | -0.81 | <0.0001 | -0.85 | <0.001  | chrZ:72301375-72320595    | Sign. WL and RJF |
| Gga.10539.2.S1_a_at     | SRFBP1        | -0.68 | <0.01   | -1.01 | <0.0001 | chrZ:73534307-73593876    | Sign. WL and RJF |
| Gga.11468.1.S1_a_at     | PPIC          | -0.73 | <0.001  | -0.62 | <0.05   | chrZ:73945599-73950771    | Sign. WL and RJF |
| GgaAffx.12368.1.S1_s_at | DCTN3         | -0.91 | <0.0001 | -0.92 | <0.001  | chrZ:7400105-7404679      | Sign. WL and RJF |
| Gga.8188.1.S1_a_at      | ---           | -0.77 | <0.001  | -0.90 | <0.001  | chrZ:74124445-74125003    | Sign. WL and RJF |
| Gga.11290.1.S1_at       | LOC768709     | -0.87 | <0.0001 | -0.77 | <0.01   | chrZ:74169618-74175695    | Sign. WL and RJF |
| GgaAffx.26489.1.S1_at   | POLR1E        | -0.82 | <0.0001 | -0.73 | <0.01   | chrZ:74199055-74203036    | Sign. WL and RJF |
| Gga.7241.1.S1_at        | GRHPR         | -0.82 | <0.0001 | -0.95 | <0.0001 | chrZ:74230601-74235890    | Sign. WL and RJF |
| Gga.13352.1.S1_at       | ZCCHC7        | -0.55 | <0.05   | -0.61 | <0.05   | chrZ:74251024-74252249    | Sign. WL and RJF |
| GgaAffx.11388.1.S1_at   | VCP           | -0.66 | <0.01   | -0.64 | <0.05   | chrZ:7931928-7954971      | Sign. WL and RJF |
| GgaAffx.1592.2.S1_at    | KIAA0258      | -0.72 | <0.001  | -0.73 | <0.01   | chrZ:8455682-8462339      | Sign. WL and RJF |
| Gga.3315.1.S1_a_at      | MRPL17        | -0.96 | <0.0001 | -0.77 | <0.01   | chrZ:8638818-8639846      | Sign. WL and RJF |
| Gga.3315.2.S1_a_at      | MRPL17        | -1.09 | <0.0001 | -0.89 | <0.001  | chrZ:8638820-8639809      | Sign. WL and RJF |
| Gga.3315.2.S1_x_at      | MRPL17        | -0.99 | <0.0001 | -0.78 | <0.01   | chrZ:8638820-8639809      | Sign. WL and RJF |
| GgaAffx.11719.1.S1_s_at | ACAA2         | -0.73 | <0.001  | -0.68 | <0.05   | chrZ:864203-877738        | Sign. WL and RJF |
| GgaAffx.11726.1.S1_at   | RCJMB04_4k14  | -0.81 | <0.0001 | -0.77 | <0.01   | chrZ:9466481-9482354      | Sign. WL and RJF |
| GgaAffx.2056.1.S1_s_at  | RCJMB04_4k14  | -0.84 | <0.0001 | -0.87 | <0.001  | chrZ:9466884-9482067      | Sign. WL and RJF |
| Gga.12669.1.S1_at       | RAD1          | -0.89 | <0.0001 | -0.85 | <0.001  | chrZ:9913430-9917002      | Sign. WL and RJF |
| GgaAffx.11728.1.S1_s_at | BXDC2         | -0.93 | <0.0001 | -0.76 | <0.01   | chrZ:9918981-9922558      | Sign. WL and RJF |
| Gga.17540.1.S1_at       | ACOT9         | NS    | NS      | -0.66 | <0.05   | chr1:121798476-121800274  | Sign. WL         |
| GgaAffx.8168.1.S1_s_at  | SLC13A4       | NS    | NS      | 0.84  | <0.001  | chr1:60454429-60515119    | Sign. WL         |
| Gga.11808.1.S1_at       | PYROXD1       | NS    | NS      | 0.62  | <0.05   | chr1:67455630-67470742    | Sign. WL         |
| GgaAffx.3400.1.S1_s_at  | C16orf73      | NS    | NS      | 0.62  | <0.05   | chr14:6082271-6088607     | Sign. WL         |
| Gga.7378.1.S1_at        | PDE6G         | NS    | NS      | 1.60  | <0.0001 | chr18:9170776-9171418     | Sign. WL         |
| Gga.17147.1.S1_s_at     | CCDC127       | NS    | NS      | 0.77  | <0.01   | chr2:87985511-87987029    | Sign. WL         |
| Gga.6201.1.S1_at        | ISG12-2       | NS    | NS      | -0.71 | <0.01   | chr2:92043529-92046970    | Sign. WL         |
| GgaAffx.4201.1.S1_s_at  | USP2          | NS    | NS      | 0.62  | <0.05   | chr24:4214460-4220496     | Sign. WL         |
| Gga.3296.1.S1_at        | GTSF1         | NS    | NS      | 0.62  | <0.05   | chr27:1011614-1025910     | Sign. WL         |
| Gga.1622.1.S1_at        | MANEA         | NS    | NS      | 0.61  | <0.05   | chr3:75857853-75858627    | Sign. WL         |
| Gga.15984.1.S1_at       | CCNG2         | NS    | NS      | 0.71  | <0.01   | chr4:36165726-36169902    | Sign. WL         |
| Gga.3551.1.S1_at        | SPP1          | NS    | NS      | 1.18  | <0.0001 | chr4:47107503-47110559    | Sign. WL         |
| Gga.1128.2.S1_a_at      | SOD3          | NS    | NS      | 0.64  | <0.05   | chr4:76179385-76181731    | Sign. WL         |
| Gga.552.1.S1_at         | DIO3          | NS    | NS      | 0.74  | <0.01   | chr5:51792817-51794155    | Sign. WL         |
| GgaAffx.5665.1.S1_at    | VWA2          | NS    | NS      | -0.68 | <0.05   | chr6:29197628-29210779    | Sign. WL         |
| Gga.11095.1.S1_s_at     | SPOPL         | NS    | NS      | 0.64  | <0.05   | chr7:32994083-33017751    | Sign. WL         |
| GgaAffx.9275.1.S1_at    | CHD1          | NS    | NS      | 0.71  | <0.01   | chrW_random:437861-450878 | Sign. WL         |
| GgaAffx.24537.1.S1_at   | PARP8         | NS    | NS      | -0.63 | <0.05   | chrZ:14212894-14321609    | Sign. WL         |
| Gga.8226.1.S1_s_at      | LOC431580     | NS    | NS      | -0.63 | <0.05   | chrZ:18915340-18949763    | Sign. WL         |
| Gga.7955.1.S1_at        | SLC14A2       | NS    | NS      | -0.62 | <0.05   | chrZ:2042236-2048956      | Sign. WL         |
| Gga.10791.1.S1_s_at     | COL4A3BP      | NS    | NS      | -0.73 | <0.01   | chrZ:23387542-23442430    | Sign. WL         |
| Gga.15064.1.S1_at       | TNPO1         | NS    | NS      | -0.68 | <0.05   | chrZ:25932295-25955137    | Sign. WL         |
| GgaAffx.9593.1.S1_at    | C9orf39       | NS    | NS      | -0.70 | <0.01   | chrZ:32677918-32685039    | Sign. WL         |
| Gga.18888.1.A1_at       | MAK10         | NS    | NS      | -0.63 | <0.05   | chrZ:40252844-40255288    | Sign. WL         |

|                         |               |       |         |       |         |                                |           |
|-------------------------|---------------|-------|---------|-------|---------|--------------------------------|-----------|
| Gga.17317.1.S1_s_at     | TRPV6         | NS    | NS      | -0.74 | <0.01   | chrZ:41094904-41101596         | Sign. WL  |
| Gga.12503.2.S1_at       | NXNL2         | NS    | NS      | -0.86 | <0.001  | chrZ:42662496-42663156         | Sign. WL  |
| GgaAffx.11649.1.S1_at   | RCJMB04_3e14  | NS    | NS      | -0.63 | <0.05   | chrZ:43555227-43588754         | Sign. WL  |
| Gga.15316.1.S1_s_at     | STARD4        | NS    | NS      | -0.80 | <0.01   | chrZ:45682743-45683859         | Sign. WL  |
| Gga.832.1.S1_at         | LOC396454     | NS    | NS      | 2.65  | <0.0001 | chrZ:52408698-52414029         | Sign. WL  |
| GgaAffx.9832.1.S1_at    | FKTN          | NS    | NS      | -0.78 | <0.01   | chrZ:53929929-53942504         | Sign. WL  |
| Gga.2141.2.S1_at        | C5orf21       | NS    | NS      | -0.90 | <0.001  | chrZ:57130372-57173562         | Sign. WL  |
| GgaAffx.25289.1.S1_at   | RASA1         | NS    | NS      | -0.61 | <0.05   | chrZ:59665193-59710880         | Sign. WL  |
| Gga.17469.1.S1_s_at     | RAD17         | NS    | NS      | -0.73 | <0.01   | chrZ:62774060-62790439         | Sign. WL  |
| Gga.4066.1.S1_at        | SMC2          | NS    | NS      | -0.64 | <0.05   | chrZ:65014193-65036340         | Sign. WL  |
| GgaAffx.1613.1.S1_at    | RCJMB04_5p1   | NS    | NS      | -0.63 | <0.05   | chrZ:6595264-6620306           | Sign. WL  |
| Gga.1495.2.S1_s_at      | SNCAIP        | NS    | NS      | -0.73 | <0.01   | chrZ:73745304-73770300         | Sign. WL  |
| Gga.10995.1.S1_s_at     | C9orf23       | NS    | NS      | -0.69 | <0.05   | chrZ:7394414-7397286           | Sign. WL  |
| GgaAffx.11974.1.S1_at   | RCJMB04_7i6   | NS    | NS      | -0.63 | <0.05   | chrZ:9721344-9743363           | Sign. WL  |
| Gga.10904.1.S1_at       | AGXT2         | NS    | NS      | -0.63 | <0.05   | chrZ:9938102-9940088           | Sign. WL  |
| Gga.19447.2.S1_s_at     | LOC770705     | -0.70 | <0.01   | NS    | NS      | ---                            | Sign. RJF |
| Gga.4975.5.S1_a_at      | TPM3          | -0.64 | <0.01   | NS    | NS      | ---                            | Sign. RJF |
| Gga.4975.5.S1_x_at      | TPM3          | -0.64 | <0.01   | NS    | NS      | ---                            | Sign. RJF |
| GgaAffx.10196.3.S1_s_at | ITSN1         | -0.72 | <0.001  | NS    | NS      | chr1:109022133-109028175       | Sign. RJF |
| Gga.2896.1.S1_at        | CBR1          | -0.53 | <0.05   | NS    | NS      | chr1:110031351-110035333       | Sign. RJF |
| Gga.11350.2.S1_at       | ACE2          | 0.62  | <0.01   | NS    | NS      | chr1:125385168-125386739       | Sign. RJF |
| GgaAffx.5027.1.S1_at    | COG5          | 0.53  | <0.05   | NS    | NS      | chr1:15708716-15731315         | Sign. RJF |
| Gga.19912.1.S1_at       | LOC427010     | 0.53  | <0.05   | NS    | NS      | chr1:165971147-165977798       | Sign. RJF |
| GgaAffx.25188.1.S1_at   | KBTBD3        | 0.53  | <0.05   | NS    | NS      | chr1:185441837-185446240       | Sign. RJF |
| Gga.9760.1.S1_at        | C12orf5       | 0.61  | <0.05   | NS    | NS      | chr1:75468455-75488310         | Sign. RJF |
| Gga.3807.1.S2_s_at      | ALDH1A3       | 0.78  | <0.001  | NS    | NS      | chr10:19570925-19612702        | Sign. RJF |
| GgaAffx.11898.1.S1_at   | FBXO22        | 0.65  | <0.01   | NS    | NS      | chr10:4433990-4440640          | Sign. RJF |
| Gga.15212.1.S1_s_at     | CNTN3         | -0.55 | <0.05   | NS    | NS      | chr12:17510323-17523754        | Sign. RJF |
| Gga.6976.1.S1_at        | LOC416235     | 0.54  | <0.05   | NS    | NS      | chr13:10614290-10624240        | Sign. RJF |
| GgaAffx.9243.3.S1_s_at  | CNOT6         | 0.63  | <0.01   | NS    | NS      | chr13:13986720-13996913        | Sign. RJF |
| Gga.876.1.S1_s_at       | B-G           | 0.66  | <0.01   | NS    | NS      | chr16:221974-224822            | Sign. RJF |
| GgaAffx.2719.1.S1_s_at  | LOC771897     | 0.58  | <0.05   | NS    | NS      | chr19:6268987-6273094          | Sign. RJF |
| Gga.13339.1.S1_at       | ST8SIA6       | 0.55  | <0.05   | NS    | NS      | chr2:19666197-19704978         | Sign. RJF |
| GgaAffx.5986.1.S1_at    | CALCR         | 0.56  | <0.05   | NS    | NS      | chr2:23010363-23064882         | Sign. RJF |
| GgaAffx.3437.3.S1_at    | PTH1R         | -0.60 | <0.05   | NS    | NS      | chr2:3543596-3543792           | Sign. RJF |
| GgaAffx.8120.2.S1_at    | C6orf85       | 0.71  | <0.01   | NS    | NS      | chr2:67380636-67387653         | Sign. RJF |
| Gga.5973.1.S1_at        | APCDD1L       | -0.59 | <0.05   | NS    | NS      | chr20:11113825-11128911        | Sign. RJF |
| Gga.3242.2.S1_at        | LOC769185     | -1.17 | <0.0001 | NS    | NS      | chr20:12367161-12395342        | Sign. RJF |
| GgaAffx.24375.2.S1_at   | PLA2G5        | 0.54  | <0.05   | NS    | NS      | chr21:4893242-4900568          | Sign. RJF |
| GgaAffx.25795.1.S1_s_at | COMP          | -0.57 | <0.05   | NS    | NS      | chr28:2889937-2904753          | Sign. RJF |
| GgaAffx.20768.1.S1_at   | SLC4A1AP      | 1.32  | <0.0001 | NS    | NS      | chr3:28994967-29001132         | Sign. RJF |
| Gga.8161.1.S1_s_at      | C1orf57       | 0.54  | <0.05   | NS    | NS      | chr3:40764729-40778491         | Sign. RJF |
| GgaAffx.11872.1.S1_at   | C1orf57       | 0.67  | <0.01   | NS    | NS      | chr3:40764732-40777843         | Sign. RJF |
| Gga.17069.1.S1_s_at     | SERTAD2       | 0.53  | <0.05   | NS    | NS      | chr3:9730898-9742633           | Sign. RJF |
| GgaAffx.12171.1.S1_s_at | RCJMB04_10b24 | 0.59  | <0.05   | NS    | NS      | chr3:98813588-98904285         | Sign. RJF |
| GgaAffx.12585.1.S1_at   | RCJMB04_18k24 | 0.60  | <0.05   | NS    | NS      | chr4:35021822-35040706         | Sign. RJF |
| Gga.1849.1.S1_at        | CHAT          | 0.55  | <0.05   | NS    | NS      | chr6:3933063-3964302           | Sign. RJF |
| GgaAffx.5692.4.S1_s_at  | RCJMB04_12b15 | 0.54  | <0.05   | NS    | NS      | chr7:15894934-15902562         | Sign. RJF |
| Gga.13607.1.S1_at       | ---           | 0.54  | <0.05   | NS    | NS      | chrUn_random:52794596-52795891 | Sign. RJF |
| Gga.19177.2.S1_at       | LOC425502     | 0.84  | <0.0001 | NS    | NS      | chrUn_random:8079297-8091122   | Sign. RJF |
| Gga.12002.1.S1_a_at     | CAPSL         | -0.69 | <0.01   | NS    | NS      | chrZ:10254114-10262495         | Sign. RJF |
| Gga.13223.1.S1_at       | TTC33         | -0.61 | <0.05   | NS    | NS      | chrZ:12268599-12304231         | Sign. RJF |
| Gga.3828.1.S1_at        | EMB           | -0.60 | <0.05   | NS    | NS      | chrZ:14147213-14166737         | Sign. RJF |
| GgaAffx.24537.1.S1_s_at | PARP8         | -0.80 | <0.001  | NS    | NS      | chrZ:14212894-14321609         | Sign. RJF |
| Gga.9708.2.S1_a_at      | PPAP2A        | -0.69 | <0.01   | NS    | NS      | chrZ:16145633-16202871         | Sign. RJF |
| GgaAffx.9335.1.S1_at    | SLC38A9       | -0.58 | <0.05   | NS    | NS      | chrZ:16229788-16265216         | Sign. RJF |
| GgaAffx.9344.1.S1_s_at  | GPBP1         | -0.67 | <0.01   | NS    | NS      | chrZ:16894595-16913564         | Sign. RJF |
| Gga.10660.2.S1_at       | PLK2          | -0.57 | <0.05   | NS    | NS      | chrZ:17389450-17395404         | Sign. RJF |
| GgaAffx.24493.1.S1_at   | PLK2          | -0.61 | <0.05   | NS    | NS      | chrZ:17390040-17394824         | Sign. RJF |
| Gga.11058.1.S1_at       | ERCC8         | -0.56 | <0.05   | NS    | NS      | chrZ:18298124-18338212         | Sign. RJF |
| Gga.17588.1.S1_at       | DIMT1L        | -0.57 | <0.05   | NS    | NS      | chrZ:18865318-18870752         | Sign. RJF |
| Gga.8226.1.S1_at        | LOC431580     | -0.70 | <0.01   | NS    | NS      | chrZ:18915340-18949763         | Sign. RJF |
| GgaAffx.20659.1.S1_at   | LOC769679     | -0.60 | <0.05   | NS    | NS      | chrZ:18935601-18936564         | Sign. RJF |
| GgaAffx.12568.1.S1_at   | CCDC5         | -0.71 | <0.01   | NS    | NS      | chrZ:1925178-1934125           | Sign. RJF |
| GgaAffx.1153.1.S1_s_at  | CCDC5         | -0.63 | <0.01   | NS    | NS      | chrZ:1928270-1932660           | Sign. RJF |
| GgaAffx.9361.1.S1_at    | RNF180        | -0.59 | <0.05   | NS    | NS      | chrZ:19448901-19520028         | Sign. RJF |
| Gga.12212.1.S1_a_at     | CENPK         | -0.64 | <0.01   | NS    | NS      | chrZ:19959937-19982485         | Sign. RJF |
| GgaAffx.11883.1.S1_at   | SLC30A5       | -0.64 | <0.01   | NS    | NS      | chrZ:21302704-21323826         | Sign. RJF |
| Gga.944.1.S1_at         | CENPH         | -0.67 | <0.01   | NS    | NS      | chrZ:21329350-21335530         | Sign. RJF |
| Gga.19614.1.S1_at       | PAPD4         | -0.54 | <0.05   | NS    | NS      | chrZ:21599064-21614031         | Sign. RJF |
| GgaAffx.2751.1.S1_at    | ARSB          | -0.64 | <0.01   | NS    | NS      | chrZ:21997832-21998718         | Sign. RJF |
| Gga.1233.2.S1_a_at      | AP3B1         | -0.55 | <0.05   | NS    | NS      | chrZ:22356768-22387932         | Sign. RJF |
| GgaAffx.9504.1.S1_at    | C5orf37       | -0.63 | <0.01   | NS    | NS      | chrZ:23312271-23322955         | Sign. RJF |
| GgaAffx.24549.1.S1_at   | ANKRD31       | -0.59 | <0.05   | NS    | NS      | chrZ:23527763-23552212         | Sign. RJF |
| GgaAffx.9494.1.S1_at    | LOC431595     | -0.58 | <0.05   | NS    | NS      | chrZ:23651377-23669383         | Sign. RJF |
| GgaAffx.9489.1.S1_s_at  | GFM2          | -0.60 | <0.05   | NS    | NS      | chrZ:23680812-23697691         | Sign. RJF |
| Gga.10677.1.S1_a_at     | PTCD2         | -0.69 | <0.01   | NS    | NS      | chrZ:26119800-26136603         | Sign. RJF |
| GgaAffx.6384.2.S1_s_at  | RCJMB04_13c10 | -0.60 | <0.05   | NS    | NS      | chrZ:26477833-26497452         | Sign. RJF |
| GgaAffx.8117.1.S1_at    | DMRT3         | 0.54  | <0.05   | NS    | NS      | chrZ:26801249-26801668         | Sign. RJF |
| GgaAffx.24608.1.S1_at   | C9orf93       | -0.56 | <0.05   | NS    | NS      | chrZ:31720785-31866352         | Sign. RJF |
| GgaAffx.25275.1.S1_at   | RIT2          | -0.92 | <0.0001 | NS    | NS      | chrZ:3301761-3323125           | Sign. RJF |
| Gga.14002.2.S1_at       | DENND4C       | -0.85 | <0.0001 | NS    | NS      | chrZ:33439594-33462784         | Sign. RJF |
| GgaAffx.21323.1.S1_at   | KIAA1797      | -0.75 | <0.001  | NS    | NS      | chrZ:33985322-34009788         | Sign. RJF |
| Gga.6358.1.S1_at        | C9orf61       | -0.63 | <0.01   | NS    | NS      | chrZ:34366203-34368642         | Sign. RJF |
| GgaAffx.24618.1.S1_s_at | ZFAND5        | -0.60 | <0.05   | NS    | NS      | chrZ:35432721-35442607         | Sign. RJF |
| Gga.2654.1.S1_at        | C9orf95       | -0.58 | <0.05   | NS    | NS      | chrZ:36391099-36397679         | Sign. RJF |
| Gga.681.2.S1_a_at       | NTRK2         | -0.64 | <0.01   | NS    | NS      | chrZ:39776254-39872350         | Sign. RJF |
| Gga.9179.1.S1_at        | RCJMB04_1b10  | -0.54 | <0.05   | NS    | NS      | chrZ:40797583-40839437         | Sign. RJF |
| GgaAffx.23948.1.S1_at   | LOC427469     | -0.68 | <0.01   | NS    | NS      | chrZ:41491447-41498239         | Sign. RJF |
| Gga.2855.1.S1_at        | HABP4         | -0.81 | <0.0001 | NS    | NS      | chrZ:41679664-41701846         | Sign. RJF |
| Gga.11912.1.S1_at       | DIRAS2        | -0.57 | <0.05   | NS    | NS      | chrZ:43162132-43280348         | Sign. RJF |
| GgaAffx.25327.1.S1_at   | APC           | -0.67 | <0.01   | NS    | NS      | chrZ:45196860-45274857         | Sign. RJF |
| Gga.10382.1.S1_s_at     | APC           | -0.82 | <0.0001 | NS    | NS      | chrZ:45214288-45274849         | Sign. RJF |
| Gga.2184.1.S1_at        | C5orf13       | -0.56 | <0.05   | NS    | NS      | chrZ:45605112-45625271         | Sign. RJF |
| Gga.17282.1.S1_at       | PAM           | -0.59 | <0.05   | NS    | NS      | chrZ:48974989-49032577         | Sign. RJF |
| Gga.4301.1.S1_at        | CHD1          | -0.56 | <0.05   | NS    | NS      | chrZ:50154415-50204555         | Sign. RJF |
| Gga.4301.2.S1_a_at      | CHD1          | -0.54 | <0.05   | NS    | NS      | chrZ:50181097-50199702         | Sign. RJF |

|                         |           |       |        |    |    |                        |           |
|-------------------------|-----------|-------|--------|----|----|------------------------|-----------|
| Gga.7694.1.S1_at        | MFSD7     | -0.56 | <0.05  | NS | NS | chrZ:51629740-51632132 | Sign. RJF |
| Gga.6091.1.S1_s_at      | ATP5I     | -0.57 | <0.05  | NS | NS | chrZ:52365085-52366954 | Sign. RJF |
| Gga.10132.1.S1_at       | RNF170    | -0.54 | <0.05  | NS | NS | chrZ:52556997-52570420 | Sign. RJF |
| Gga.8587.1.S1_at        | LOC427125 | -0.72 | <0.001 | NS | NS | chrZ:55189439-55200086 | Sign. RJF |
| Gga.635.1.S1_at         | GLRX      | -0.59 | <0.05  | NS | NS | chrZ:56240542-56249419 | Sign. RJF |
| GgaAffx.25682.1.S1_s_at | NEDD4L    | -0.66 | <0.01  | NS | NS | chrZ:590978-629918     | Sign. RJF |
| Gga.6171.1.S1_a_at      | COX7C     | -0.61 | <0.05  | NS | NS | chrZ:59900906-59904132 | Sign. RJF |
| Gga.4974.1.S1_at        | VCAN      | -0.56 | <0.05  | NS | NS | chrZ:61307546-61406145 | Sign. RJF |
| GgaAffx.24733.1.S1_at   | XRCC4     | -0.73 | <0.001 | NS | NS | chrZ:61443250-61535260 | Sign. RJF |
| Gga.3441.2.S1_s_at      | TMEM167   | -0.59 | <0.05  | NS | NS | chrZ:61618461-61640282 | Sign. RJF |
| Gga.13124.1.S1_at       | LOC427324 | -0.65 | <0.01  | NS | NS | chrZ:62003926-62019699 | Sign. RJF |
| Gga.7337.1.S1_at        | SSBP2     | -0.55 | <0.05  | NS | NS | chrZ:62191512-62361161 | Sign. RJF |
| Gga.2944.2.S1_a_at      | NEDD4L    | -0.54 | <0.05  | NS | NS | chrZ:626577-630210     | Sign. RJF |
| GgaAffx.24720.1.S1_at   | LOC768383 | -0.60 | <0.05  | NS | NS | chrZ:62736226-62756460 | Sign. RJF |
| GgaAffx.9996.2.S1_at    | SUSD1     | -0.57 | <0.05  | NS | NS | chrZ:64707508-64722460 | Sign. RJF |
| Gga.18415.1.A1_at       | ELAVL2    | -0.55 | <0.05  | NS | NS | chrZ:65978273-65979579 | Sign. RJF |
| Gga.1774.1.S1_at        | C9orf82   | -0.54 | <0.05  | NS | NS | chrZ:66771681-66788733 | Sign. RJF |
| GgaAffx.25442.1.S1_s_at | SEMA6A    | -0.71 | <0.01  | NS | NS | chrZ:70721111-70780614 | Sign. RJF |
| Gga.11356.1.S1_s_at     | ATG12     | -0.68 | <0.01  | NS | NS | chrZ:71047297-71049202 | Sign. RJF |
| Gga.7932.1.S1_s_at      | ATG12     | -0.71 | <0.01  | NS | NS | chrZ:71047356-71049202 | Sign. RJF |
| Gga.16647.1.S1_at       | DNAI1     | -0.79 | <0.001 | NS | NS | chrZ:7336093-7390055   | Sign. RJF |
| GgaAffx.3333.1.S1_at    | SNCAIP    | -0.78 | <0.001 | NS | NS | chrZ:73727423-73776692 | Sign. RJF |
| Gga.10995.1.S1_at       | C9orf23   | -0.75 | <0.001 | NS | NS | chrZ:7394414-7397286   | Sign. RJF |
| Gga.9925.1.S1_at        | C9orf23   | -0.65 | <0.01  | NS | NS | chrZ:7394417-7396762   | Sign. RJF |
| Gga.3857.1.S1_s_at      | FANCG     | -0.61 | <0.05  | NS | NS | chrZ:7956394-7961602   | Sign. RJF |
| GgaAffx.1592.1.S1_s_at  | KIAA0258  | -0.65 | <0.01  | NS | NS | chrZ:8455733-8462336   | Sign. RJF |
| Gga.4975.2.S1_a_at      | TPM3      | -0.65 | <0.01  | NS | NS | chrZ:8546811-8554861   | Sign. RJF |
| Gga.12332.1.S1_at       | GOLPH3    | -0.57 | <0.05  | NS | NS | chrZ:9011769-9044681   | Sign. RJF |
| Gga.4786.1.S1_at        | C18orf32  | -0.66 | <0.01  | NS | NS | chrZ:968727-972168     | Sign. RJF |

Genebuild: WASHUC2.
