# Supplementary material for: Large Sex Differences in Chicken Behavior and Brain Gene Expression Coincide with Few Differences in Promoter DNA-Methylation
Source: PubMed Central journal article supplement (PMC4004567; doi:10.1371/journal.pone.0096376), 2014-04-29
Supplement: pone.0096376.s003.pdf [file pone.0096376.s003.pdf]

**Table S2.** Significantly differentially methylated probes in females related to males.

| Spot ID           | Probe start (bp) | Promoter range (bp)            | Red Junglefowl |               | White Leghorn |               | Closest gene(s)          | Type             |
|-------------------|------------------|--------------------------------|----------------|---------------|---------------|---------------|--------------------------|------------------|
|                   |                  |                                | Log2 FC        | p-value (FDR) | Log2 FC       | p-value (FDR) |                          |                  |
| CHR01FS165984037  | 165984037        | chr1:165977159-165987659       | 2.38           | 0.016         | 1.81          | 0.018         | ZFR                      | Sign. RJF and WL |
| CHRUNRFS022700108 | 22700108         | chrUN_random:22699192-22709692 | 2.88           | 0.010         | 3.09          | 0.000         | LOC429831; ZNF687        | Sign. RJF and WL |
| CHRUNRFS022700255 | 22700255         | chrUN_random:22699192-22709692 | 2.99           | 0.021         | 2.66          | 0.001         | LOC429831; ZNF687        | Sign. RJF and WL |
| CHRUNRFS022700359 | 22700359         | chrUN_random:22699192-22709692 | 2.20           | 0.042         | 2.56          | 0.001         | LOC429831; ZNF687        | Sign. RJF and WL |
| CHRUNRFS022699719 | 22699719         | chrUN_random:22699192-22709692 | 2.37           | 0.018         | 2.60          | 0.002         | LOC429831; ZNF687        | Sign. RJF and WL |
| CHRUNRFS022699894 | 22699894         | chrUN_random:22699192-22709692 | 2.41           | 0.016         | 2.16          | 0.004         | LOC429831; ZNF687        | Sign. RJF and WL |
| CHRUNRFS047164881 | 47164881         | chrUN_random:47158633-47169133 | 2.95           | 0.018         | 2.95          | 0.000         | LOC430910; BTF3          | Sign. RJF and WL |
| CHRUNRFS047164971 | 47164971         | chrUN_random:47158633-47169133 | 2.52           | 0.008         | 2.71          | 0.001         | LOC430910; BTF3          | Sign. RJF and WL |
| CHRUNRFS047163667 | 47163667         | chrUN_random:47158633-47169133 | 2.38           | 0.018         | 2.41          | 0.002         | LOC430910; BTF3          | Sign. RJF and WL |
| CHRZFS027968870   | 27968870         | chrZ:27967699-27978199         | -4.12          | 0.002         | -3.49         | 0.000         | Novel gene in MHM        | Sign. RJF and WL |
| CHRZFS027971096   | 27971096         | chrZ:27967699-27978199         | -4.37          | 0.002         | -3.53         | 0.000         | Novel gene in MHM        | Sign. RJF and WL |
| CHRZFS027968782   | 27968782         | chrZ:27967699-27978199         | -4.40          | 0.006         | -3.59         | 0.000         | Novel gene in MHM        | Sign. RJF and WL |
| CHRZFS027970826   | 27970826         | chrZ:27967699-27978199         | -4.52          | 0.002         | -3.48         | 0.000         | Novel gene in MHM        | Sign. RJF and WL |
| CHRZFS027970734   | 27970734         | chrZ:27967699-27978199         | -3.79          | 0.002         | -3.44         | 0.000         | Novel gene in MHM        | Sign. RJF and WL |
| CHRZFS027971438   | 27971438         | chrZ:27967699-27978199         | -4.01          | 0.006         | -3.24         | 0.000         | Novel gene in MHM        | Sign. RJF and WL |
| CHRZFS027971518   | 27971518         | chrZ:27967699-27978199         | -3.28          | 0.034         | -3.56         | 0.000         | Novel gene in MHM        | Sign. RJF and WL |
| CHRZFS027971708   | 27971708         | chrZ:27967699-27978199         | -3.59          | 0.006         | -3.20         | 0.000         | Novel gene in MHM        | Sign. RJF and WL |
| CHRZFS027970474   | 27970474         | chrZ:27967699-27978199         | -3.52          | 0.002         | -3.26         | 0.000         | Novel gene in MHM        | Sign. RJF and WL |
| CHRZFS027968948   | 27968948         | chrZ:27967699-27978199         | -4.03          | 0.002         | -3.19         | 0.000         | Novel gene in MHM        | Sign. RJF and WL |
| CHRZFS027971864   | 27971864         | chrZ:27967699-27978199         | -3.58          | 0.002         | -3.02         | 0.000         | Novel gene in MHM        | Sign. RJF and WL |
| CHRZFS027968698   | 27968698         | chrZ:27967699-27978199         | -4.08          | 0.016         | -3.01         | 0.000         | Novel gene in MHM        | Sign. RJF and WL |
| CHRZFS027969122   | 27969122         | chrZ:27967699-27978199         | -2.91          | 0.013         | -2.88         | 0.000         | Novel gene in MHM        | Sign. RJF and WL |
| CHRZFS027971784   | 27971784         | chrZ:27967699-27978199         | -3.32          | 0.003         | -3.14         | 0.000         | Novel gene in MHM        | Sign. RJF and WL |
| CHRZFS027970994   | 27970994         | chrZ:27967699-27978199         | -3.57          | 0.002         | -3.27         | 0.000         | Novel gene in MHM        | Sign. RJF and WL |
| CHRZFS027970914   | 27970914         | chrZ:27967699-27978199         | -3.42          | 0.003         | -3.09         | 0.000         | Novel gene in MHM        | Sign. RJF and WL |
| CHRZFS027969820   | 27969820         | chrZ:27967699-27978199         | -3.18          | 0.006         | -3.18         | 0.000         | Novel gene in MHM        | Sign. RJF and WL |
| CHRZFS027970404   | 27970404         | chrZ:27967699-27978199         | -3.02          | 0.006         | -2.77         | 0.000         | Novel gene in MHM        | Sign. RJF and WL |
| CHRZFS027971272   | 27971272         | chrZ:27967699-27978199         | -4.41          | 0.007         | -2.76         | 0.000         | Novel gene in MHM        | Sign. RJF and WL |
| CHRZFS027971170   | 27971170         | chrZ:27967699-27978199         | -3.53          | 0.046         | -2.73         | 0.000         | Novel gene in MHM        | Sign. RJF and WL |
| CHRZFS027969480   | 27969480         | chrZ:27967699-27978199         | -2.99          | 0.006         | -2.67         | 0.001         | Novel gene in MHM        | Sign. RJF and WL |
| CHRZFS027969046   | 27969046         | chrZ:27967699-27978199         | -3.33          | 0.002         | -2.94         | 0.001         | Novel gene in MHM        | Sign. RJF and WL |
| CHRZFS027970316   | 27970316         | chrZ:27967699-27978199         | -2.87          | 0.005         | -2.72         | 0.001         | Novel gene in MHM        | Sign. RJF and WL |
| CHRZFS027971618   | 27971618         | chrZ:27967699-27978199         | -3.26          | 0.006         | -2.82         | 0.001         | Novel gene in MHM        | Sign. RJF and WL |
| CHRZFS027970570   | 27970570         | chrZ:27967699-27978199         | -3.87          | 0.002         | -3.15         | 0.001         | Novel gene in MHM        | Sign. RJF and WL |
| CHRZFS027969390   | 27969390         | chrZ:27967699-27978199         | -2.74          | 0.006         | -2.67         | 0.001         | Novel gene in MHM        | Sign. RJF and WL |
| CHRZFS027969638   | 27969638         | chrZ:27967699-27978199         | -3.05          | 0.003         | -2.58         | 0.001         | Novel gene in MHM        | Sign. RJF and WL |
| CHRZFS027969206   | 27969206         | chrZ:27967699-27978199         | -2.90          | 0.006         | -2.84         | 0.002         | Novel gene in MHM        | Sign. RJF and WL |
| CHRZFS027969904   | 27969904         | chrZ:27967699-27978199         | -2.76          | 0.007         | -2.61         | 0.002         | Novel gene in MHM        | Sign. RJF and WL |
| CHRZFS027972400   | 27972400         | chrZ:27967699-27978199         | -3.42          | 0.002         | -2.96         | 0.002         | Novel gene in MHM        | Sign. RJF and WL |
| CHRZFS027972058   | 27972058         | chrZ:27967699-27978199         | -2.39          | 0.014         | -2.14         | 0.004         | Novel gene in MHM        | Sign. RJF and WL |
| CHRZFS027970210   | 27970210         | chrZ:27967699-27978199         | -2.67          | 0.016         | -2.39         | 0.007         | Novel gene in MHM        | Sign. RJF and WL |
| CHRZFS027971964   | 27971964         | chrZ:27967699-27978199         | -2.37          | 0.021         | -2.06         | 0.010         | Novel gene in MHM        | Sign. RJF and WL |
| CHRZFS027970660   | 27970660         | chrZ:27967699-27978199         | -2.48          | 0.014         | -1.98         | 0.012         | Novel gene in MHM        | Sign. RJF and WL |
| CHRZFS027969724   | 27969724         | chrZ:27967699-27978199         | -2.76          | 0.018         | -1.88         | 0.014         | Novel gene in MHM        | Sign. RJF and WL |
| CHRZFS027972304   | 27972304         | chrZ:27967699-27978199         | -2.07          | 0.047         | -2.06         | 0.016         | Novel gene in MHM        | Sign. RJF and WL |
| CHRZFS027972144   | 27972144         | chrZ:27967699-27978199         | -2.40          | 0.016         | -1.91         | 0.034         | Novel gene in MHM        | Sign. RJF and WL |
| CHR01FS165983959  | 165983959        | chr1:165977159-165987659       | 2.04           | 0.035         | NA            | NA            | ZFR                      | Sign. RJF        |
| CHR01FS067458774  | 67458774         | chr1:67448444-67458944         | -2.64          | 0.016         | NA            | NA            | PYROXD1                  | Sign. RJF        |
| CHR04FS068950313  | 68950313         | chr4:68945836-68956336         | 3.44           | 0.013         | NA            | NA            | GABRA2                   | Sign. RJF        |
| CHR04FS087527256  | 87527256         | chr4:87522175-87532675         | -2.50          | 0.024         | NA            | NA            | LOC776823; LOC777427; LO | Sign. RJF        |
| CHR05FS015215576  | 15215576         | chr5:15209550-15229085         | -2.09          | 0.042         | NA            | NA            | LOC770392; CTSD          | Sign. RJF        |
| CHR06FS031517001  | 31517001         | chr6:31506915-31517415         | -3.59          | 0.016         | NA            | NA            | SFXN4                    | Sign. RJF        |
| CHR08FS021474416  | 21474416         | chr8:21470578-21487179         | 3.47           | 0.035         | NA            | NA            | KIF2C; SNORD38; RPS8     | Sign. RJF        |
| CHR11FS010792270  | 10792270         | chr11:10782699-10793199        | 1.98           | 0.047         | NA            | NA            | SLC7A10                  | Sign. RJF        |
| CHR16FS000197847  | 197847           | chr16:184547-208882            | 2.10           | 0.039         | NA            | NA            | ZNF692; BG2; LOC769104   | Sign. RJF        |
| CHRZFS027972218   | 27972218         | chrZ:27967699-27978199         | -2.04          | 0.031         | NA            | NA            | Novel gene in MHM        | Sign. RJF        |
| CHR01FS104511276  | 104511276        | chr1:104503033-104513533       | NA             | NA            | 1.71          | 0.036         |                          | Sign. WL         |
| CHR01FS112367091  | 112367091        | chr1:112360548-112371048       | NA             | NA            | -1.93         | 0.011         | MX1                      | Sign. WL         |
| CHR01FS171203823  | 171203823        | chr1:171199298-171209798       | NA             | NA            | -2.52         | 0.001         | ENOX1                    | Sign. WL         |
| CHR01FS017194209  | 17194209         | chr1:17192667-17203167         | NA             | NA            | -2.68         | 0.001         | CERK; LOC770266          | Sign. WL         |
| CHR01FS189526406  | 189526406        | chr1:189521776-189535485       | NA             | NA            | -4.14         | 0.036         | FAM76B; CEP57            | Sign. WL         |
| CHR01FS004027302  | 4027302          | chr1:4022655-4033155           | NA             | NA            | 2.28          | 0.005         | LOC419112; LOC776999     | Sign. WL         |
| CHR01FS055943153  | 55943153         | chr1:55938503-55951519         | NA             | NA            | 2.55          | 0.001         | CKAP4; TCP11L2           | Sign. WL         |
| CHR01FS087115614  | 87115614         | chr1:87113677-87124177         | NA             | NA            | 3.02          | 0.005         | ATP1B1                   | Sign. WL         |
| CHR02FS023275619  | 23275619         | chr2:23275059-23285559         | NA             | NA            | -4.89         | 0.002         | LOC420562                | Sign. WL         |
| CHR02FS044500430  | 44500430         | chr2:44494000-44504500         | NA             | NA            | 2.55          | 0.001         | CRTAP                    | Sign. WL         |
| CHR02FS057276958  | 57276958         | chr2:57271808-57282308         | NA             | NA            | -2.52         | 0.024         |                          | Sign. WL         |
| CHR02FS067096593  | 67096593         | chr2:67086288-67096788         | NA             | NA            | 2.81          | 0.004         | PECI; ECI2               | Sign. WL         |
| CHR02FS069054327  | 69054327         | chr2:69053627-69064127         | NA             | NA            | 3.55          | 0.001         | BCL2                     | Sign. WL         |
| CHR21FS006498679  | 6498679          | chr21:6498659-6509159          | NA             | NA            | -3.16         | 0.002         | WNT4                     | Sign. WL         |
| CHR03FS069666761  | 69666761         | chr3:69657369-69667869         | NA             | NA            | -3.36         | 0.001         | LOC421765                | Sign. WL         |
| CHR03FS074101495  | 74101495         | chr3:74098092-74108592         | NA             | NA            | -3.72         | 0.000         | LOC421792                | Sign. WL         |
| CHR04FS065059350  | 65059350         | chr4:65049419-65059919         | NA             | NA            | -4.11         | 0.000         | ZDHC2                    | Sign. WL         |
| CHR05FS028117494  | 28117494         | chr5:28109050-28119550         | NA             | NA            | -2.75         | 0.011         | TTBK2                    | Sign. WL         |
| CHR05FS062145487  | 62145487         | chr5:62143821-62154321         | NA             | NA            | 3.43          | 0.014         | LRFN5                    | Sign. WL         |
| CHR06FS012548288  | 12548288         | chr6:12539210-12552607         | NA             | NA            | 2.50          | 0.001         | SGPL1; ANAPC16; ASCC1    | Sign. WL         |
| CHR12FS009183544  | 9183544          | chr12:9174486-9184986          | NA             | NA            | 2.08          | 0.014         | DNASE1L3                 | Sign. WL         |
| CHR13FS001411354  | 1411354          | chr13:1404838-1415338          | NA             | NA            | 2.20          | 0.011         | PFDN1                    | Sign. WL         |
| CHR15FS004985794  | 4985794          | chr15:4977144-4991115          | NA             | NA            | -2.25         | 0.020         | TCTN2                    | Sign. WL         |
| CHR18FS006303887  | 6303887          | chr18:6296368-6306868          | NA             | NA            | -2.68         | 0.041         | COIL                     | Sign. WL         |
| CHRZFS010859212   | 10859212         | chrZ:10857968-10868468         | NA             | NA            | -2.05         | 0.041         | CZH5orf42                | Sign. WL         |
| CHRZFS027969552   | 27969552         | chrZ:27967699-27978199         | NA             | NA            | -2.37         | 0.002         | Novel gene in MHM        | Sign. WL         |
| CHRZFS027969994   | 27969994         | chrZ:27967699-27978199         | NA             | NA            | -2.09         | 0.005         | Novel gene in MHM        | Sign. WL         |
| CHRUNRFS020865610 | 20865610         | chrUN_random:20863480-20873980 | NA             | NA            | 1.81          | 0.030         | LOC425449; LOC426662     | Sign. WL         |
| CHRUNRFS020865792 | 20865792         | chrUN_random:20863480-20873980 | NA             | NA            | 1.72          | 0.037         | LOC425449; LOC426662     | Sign. WL         |
| CHRUNRFS022699787 | 22699787         | chrUN_random:22699192-22709692 | NA             | NA            | 2.18          | 0.004         | LOC429831; ZNF687        | Sign. WL         |
| CHRUNRFS022703457 | 22703457         | chrUN_random:22699192-22709692 | NA             | NA            | 2.11          | 0.004         | LOC429831; ZNF687        | Sign. WL         |
| CHRUNRFS022703739 | 22703739         | chrUN_random:22699192-22709692 | NA             | NA            | 1.93          | 0.013         | LOC429831; ZNF687        | Sign. WL         |
| CHRUNRFS047163489 | 47163489         | chrUN_random:47158633-47169133 | NA             | NA            | 1.95          | 0.010         | LOC430910; BTF3          | Sign. WL         |
| CHRUNRFS063230313 | 63230313         | chrUN_random:63226657-63237157 | NA             | NA            | 1.82          | 0.040         | AP2S1                    | Sign. WL         |

Genebuild: WASHUC2.
