# Supplementary material for: Large Sex Differences in Chicken Behavior and Brain Gene Expression Coincide with Few Differences in Promoter DNA-Methylation
Source: PubMed Central journal article supplement (PMC4004567; doi:10.1371/journal.pone.0096376), 2014-04-29
Supplement: pone.0096376.s004.pdf [file pone.0096376.s004.pdf]

**Table S3.** Gene ontology analysis of significantly differentially expressed (DE) genes in females related to males, given as a 30 toplist within different categories.

| Category                                                                         | GO ID      | GO term                                                                                               | GO Level               | Occurrence in |           | Significance |              |
|----------------------------------------------------------------------------------|------------|-------------------------------------------------------------------------------------------------------|------------------------|---------------|-----------|--------------|--------------|
|                                                                                  |            |                                                                                                       |                        | Reference     | Test list | Pval.        | Pval. FDR-BH |
| <b>All DE genes across breeds (242 homologs found of 315 probesets included)</b> |            |                                                                                                       |                        |               |           |              |              |
|                                                                                  | GO:0007166 | cell surface receptor signaling pathway                                                               | 3, 4, 5                | 2224          | 18        | 0.000        | 0.234        |
|                                                                                  | GO:0023052 | signaling                                                                                             | 1                      | 4227          | 47        | 0.000        | 0.215        |
|                                                                                  | GO:0009892 | negative regulation of metabolic process                                                              | 2, 3, 4                | 1162          | 6         | 0.000        | 0.153        |
|                                                                                  | GO:0006081 | cellular aldehyde metabolic process                                                                   | 3                      | 34            | 5         | 0.000        | 0.116        |
|                                                                                  | GO:0001574 | ganglioside biosynthetic process                                                                      | 7, 8, 9, 10            | 8             | 3         | 0.000        | 0.104        |
|                                                                                  | GO:0007154 | cell communication                                                                                    | 2                      | 4327          | 49        | 0.000        | 0.093        |
|                                                                                  | GO:0006672 | ceramide metabolic process                                                                            | 7, 8                   | 62            | 6         | 0.000        | 0.153        |
|                                                                                  | GO:0007186 | G-protein coupled receptor signaling pathway                                                          | 4, 5, 6                | 903           | 4         | 0.000        | 0.141        |
|                                                                                  | GO:0031324 | negative regulation of cellular metabolic process                                                     | 3, 4, 5                | 1085          | 6         | 0.001        | 0.132        |
|                                                                                  | GO:0007005 | mitochondrion organization                                                                            | 5                      | 177           | 10        | 0.001        | 0.124        |
|                                                                                  | GO:0065007 | biological regulation                                                                                 | 1                      | 7420          | 100       | 0.001        | 0.123        |
|                                                                                  | GO:0000279 | M phase                                                                                               | 4, 5                   | 477           | 18        | 0.001        | 0.114        |
|                                                                                  | GO:0046519 | sphingoid metabolic process                                                                           | 6, 7                   | 66            | 6         | 0.001        | 0.114        |
|                                                                                  | GO:0010605 | negative regulation of macromolecule metabolic process                                                | 3, 4, 5                | 1057          | 6         | 0.001        | 0.118        |
|                                                                                  | GO:0010165 | response to X-ray                                                                                     | 5                      | 26            | 4         | 0.001        | 0.115        |
|                                                                                  | GO:0045716 | positive regulation of low-density lipoprotein particle receptor biosynthetic process                 | 5, 6, 7, 8             | 3             | 2         | 0.001        | 0.114        |
|                                                                                  | GO:0022403 | cell cycle phase                                                                                      | 3, 4                   | 756           | 24        | 0.001        | 0.120        |
|                                                                                  | GO:0071310 | cellular response to organic substance                                                                | 4                      | 848           | 4         | 0.001        | 0.127        |
|                                                                                  | GO:0000278 | mitotic cell cycle                                                                                    | 3                      | 688           | 22        | 0.001        | 0.154        |
|                                                                                  | GO:0007165 | signal transduction                                                                                   | 2, 3, 4                | 3830          | 45        | 0.001        | 0.146        |
|                                                                                  | GO:0001573 | ganglioside metabolic process                                                                         | 7, 8, 9                | 14            | 3         | 0.001        | 0.146        |
|                                                                                  | GO:0006974 | response to DNA damage stimulus                                                                       | 4                      | 560           | 19        | 0.001        | 0.144        |
|                                                                                  | GO:0009890 | negative regulation of biosynthetic process                                                           | 3, 4, 5                | 906           | 5         | 0.002        | 0.150        |
|                                                                                  | GO:0051297 | centrosome organization                                                                               | 5, 6, 8                | 53            | 5         | 0.002        | 0.146        |
|                                                                                  | GO:0072369 | regulation of lipid transport by positive regulation of transcription from RNA polymerase II promoter | 6, 7, 8, 9, 10, 11, 12 | 4             | 2         | 0.002        | 0.144        |
|                                                                                  | GO:0010988 | regulation of low-density lipoprotein particle clearance                                              | 4, 5, 6                | 4             | 2         | 0.002        | 0.138        |
|                                                                                  | GO:0006396 | RNA processing                                                                                        | 4, 5, 6, 7             | 569           | 19        | 0.002        | 0.138        |
|                                                                                  | GO:0031327 | negative regulation of cellular biosynthetic process                                                  | 4, 5, 6                | 893           | 5         | 0.002        | 0.144        |
|                                                                                  | GO:0033554 | cellular response to stress                                                                           | 3                      | 991           | 28        | 0.002        | 0.142        |
|                                                                                  | GO:0006688 | glycosphingolipid biosynthetic process                                                                | 6, 7, 8                | 16            | 3         | 0.002        | 0.153        |
| <b>Higher DE genes across breeds (52 genes found of 67 probesets included)</b>   |            |                                                                                                       |                        |               |           |              |              |
|                                                                                  | GO:0035261 | external genitalia morphogenesis                                                                      | 4, 5, 6, 7             | 6             | 2         | 0.000        | 0.163        |
|                                                                                  | GO:0061010 | gall bladder development                                                                              | 4, 5                   | 6             | 2         | 0.000        | 0.082        |
|                                                                                  | GO:0040018 | positive regulation of multicellular organism growth                                                  | 3, 4, 5                | 34            | 3         | 0.000        | 0.063        |
|                                                                                  | GO:0034086 | maintenance of sister chromatid cohesion                                                              | 3, 4, 5, 7             | 8             | 2         | 0.000        | 0.076        |
|                                                                                  | GO:0034088 | maintenance of mitotic sister chromatid cohesion                                                      | 4, 5, 6, 7, 8, 9, 10   | 8             | 2         | 0.000        | 0.061        |
|                                                                                  | GO:0061038 | uterus morphogenesis                                                                                  | 3, 4, 5, 6             | 8             | 2         | 0.000        | 0.050        |
|                                                                                  | GO:0060324 | face development                                                                                      | 3, 4                   | 42            | 3         | 0.000        | 0.051        |
|                                                                                  | GO:0071481 | cellular response to X-ray                                                                            | 6                      | 9             | 2         | 0.000        | <b>0.049</b> |
|                                                                                  | GO:0035117 | embryonic arm morphogenesis                                                                           | 7, 8                   | 9             | 2         | 0.000        | <b>0.043</b> |
|                                                                                  | GO:0035140 | arm morphogenesis                                                                                     | 6, 7                   | 9             | 2         | 0.000        | <b>0.039</b> |
|                                                                                  | GO:0007064 | mitotic sister chromatid cohesion                                                                     | 4, 5, 6, 7, 8, 9       | 10            | 2         | 0.000        | <b>0.044</b> |
|                                                                                  | GO:0031065 | positive regulation of histone deacetylation                                                          | 6, 7, 8, 9, 10, 11, 12 | 11            | 2         | 0.001        | <b>0.049</b> |
|                                                                                  | GO:0090312 | positive regulation of protein deacetylation                                                          | 6, 7, 8, 9             | 13            | 2         | 0.001        | 0.064        |
|                                                                                  | GO:0060322 | head development                                                                                      | 3                      | 58            | 3         | 0.001        | 0.065        |
|                                                                                  | GO:0048703 | embryonic viscerocranium morphogenesis                                                                | 4, 5, 7, 8, 9          | 14            | 2         | 0.001        | 0.064        |
|                                                                                  | GO:0031063 | regulation of histone deacetylation                                                                   | 6, 7, 8, 9, 11         | 15            | 2         | 0.001        | 0.069        |
|                                                                                  | GO:0090311 | regulation of protein deacetylation                                                                   | 6, 7, 8                | 17            | 2         | 0.001        | 0.084        |
|                                                                                  | GO:0060065 | uterus development                                                                                    | 4, 5                   | 18            | 2         | 0.002        | 0.089        |
|                                                                                  | GO:0042634 | regulation of hair cycle                                                                              | 3, 4                   | 18            | 2         | 0.002        | 0.084        |
|                                                                                  | GO:0035112 | genitalia morphogenesis                                                                               | 3, 4, 5, 6             | 18            | 2         | 0.002        | 0.080        |
|                                                                                  | GO:0040014 | regulation of multicellular organism growth                                                           | 3, 4                   | 81            | 3         | 0.002        | 0.111        |
|                                                                                  | GO:0032800 | receptor biosynthetic process                                                                         | 4, 5                   | 22            | 2         | 0.002        | 0.109        |
|                                                                                  | GO:0048557 | embryonic digestive tract morphogenesis                                                               | 4, 5, 6, 7             | 24            | 2         | 0.003        | 0.123        |
|                                                                                  | GO:0010165 | response to X-ray                                                                                     | 5                      | 26            | 2         | 0.003        | 0.138        |
|                                                                                  | GO:0031058 | positive regulation of histone modification                                                           | 5, 6, 7, 8, 9, 10, 11  | 28            | 2         | 0.004        | 0.124        |
|                                                                                  | GO:0048562 | embryonic organ morphogenesis                                                                         | 4, 5, 6                | 211           | 4         | 0.005        | 0.144        |
|                                                                                  | GO:0035115 | embryonic forelimb morphogenesis                                                                      | 6, 7                   | 31            | 2         | 0.005        | 0.142        |
|                                                                                  | GO:0007062 | sister chromatid cohesion                                                                             | 3, 4, 6                | 31            | 2         | 0.005        | 0.138        |
|                                                                                  | GO:0060325 | face morphogenesis                                                                                    | 3, 4, 5, 6             | 32            | 2         | 0.005        | 0.142        |
|                                                                                  | GO:2001252 | positive regulation of chromosome organization                                                        | 4, 5, 6, 7             | 32            | 2         | 0.005        | 0.138        |
| <b>Lower DE genes across breeds (191 genes found of 248 probesets included)</b>  |            |                                                                                                       |                        |               |           |              |              |
|                                                                                  | GO:0065007 | biological regulation                                                                                 | 1                      | 7420          | 73        | 0.000        | 0.097        |
|                                                                                  | GO:0009892 | negative regulation of metabolic process                                                              | 2, 3, 4                | 1162          | 3         | 0.000        | 0.076        |
|                                                                                  | GO:0031324 | negative regulation of cellular metabolic process                                                     | 3, 4, 5                | 1085          | 3         | 0.000        | 0.124        |
|                                                                                  | GO:0010605 | negative regulation of macromolecule metabolic process                                                | 3, 4, 5                | 1057          | 3         | 0.000        | 0.128        |
|                                                                                  | GO:0009890 | negative regulation of biosynthetic process                                                           | 3, 4, 5                | 906           | 2         | 0.000        | 0.106        |
|                                                                                  | GO:0007186 | G-protein coupled receptor signaling pathway                                                          | 4, 5, 6                | 903           | 2         | 0.000        | 0.094        |
|                                                                                  | GO:0031327 | negative regulation of cellular biosynthetic process                                                  | 4, 5, 6                | 893           | 2         | 0.000        | 0.093        |
|                                                                                  | GO:0007154 | cell communication                                                                                    | 2                      | 4327          | 38        | 0.000        | 0.091        |
|                                                                                  | GO:0023052 | signaling                                                                                             | 1                      | 4227          | 37        | 0.000        | 0.091        |
|                                                                                  | GO:0007005 | mitochondrion organization                                                                            | 5                      | 177           | 9         | 0.000        | 0.087        |
|                                                                                  | GO:0006281 | DNA repair                                                                                            | 5, 6, 7                | 392           | 14        | 0.001        | 0.080        |
|                                                                                  | GO:0009889 | regulation of biosynthetic process                                                                    | 3, 4                   | 2809          | 21        | 0.001        | 0.079        |
|                                                                                  | GO:0010556 | regulation of macromolecule biosynthetic process                                                      | 4, 5                   | 2615          | 19        | 0.001        | 0.080        |
|                                                                                  | GO:0050794 | regulation of cellular process                                                                        | 2, 3                   | 6661          | 68        | 0.001        | 0.076        |
|                                                                                  | GO:0051297 | centrosome organization                                                                               | 5, 6, 8                | 53            | 5         | 0.001        | 0.072        |
|                                                                                  | GO:0010468 | regulation of gene expression                                                                         | 4, 5                   | 2700          | 20        | 0.001        | 0.070        |
|                                                                                  | GO:0050789 | regulation of biological process                                                                      | 1, 2                   | 7035          | 73        | 0.001        | 0.067        |
|                                                                                  | GO:0031326 | regulation of cellular biosynthetic process                                                           | 4, 5                   | 2785          | 21        | 0.001        | 0.066        |
|                                                                                  | GO:0007166 | cell surface receptor signaling pathway                                                               | 3, 4, 5                | 2224          | 15        | 0.001        | 0.066        |
|                                                                                  | GO:0010558 | negative regulation of macromolecule biosynthetic process                                             | 4, 5, 6                | 821           | 2         | 0.001        | 0.075        |
|                                                                                  | GO:0031023 | microtubule organizing center organization                                                            | 4, 5, 7                | 58            | 5         | 0.001        | 0.076        |
|                                                                                  | GO:2000112 | regulation of cellular macromolecule biosynthetic process                                             | 5, 6                   | 2556          | 19        | 0.001        | 0.074        |
|                                                                                  | GO:0006081 | cellular aldehyde metabolic process                                                                   | 3                      | 34            | 4         | 0.001        | 0.074        |
|                                                                                  | GO:0006351 | transcription, DNA-dependent                                                                          | 4, 5, 6, 7, 8          | 2458          | 18        | 0.001        | 0.072        |
|                                                                                  | GO:2001141 | regulation of RNA biosynthetic process                                                                | 5, 6, 7, 8             | 2358          | 17        | 0.001        | 0.074        |
|                                                                                  | GO:0032774 | RNA biosynthetic process                                                                              | 4, 5, 6, 7             | 2529          | 19        | 0.001        | 0.077        |
|                                                                                  | GO:0006355 | regulation of transcription, DNA-dependent                                                            | 5, 6, 7, 8, 9          | 2341          | 17        | 0.001        | 0.078        |
|                                                                                  | GO:0006672 | ceramide metabolic process                                                                            | 7, 8                   | 62            | 5         | 0.001        | 0.079        |
|                                                                                  | GO:0006364 | rRNA processing                                                                                       | 6, 7, 8, 9             | 94            | 6         | 0.001        | 0.083        |
|                                                                                  | GO:2000113 | negative regulation of cellular macromolecule biosynthetic process                                    | 5, 6, 7                | 781           | 2         | 0.001        | 0.083        |
| <b>All DE genes in RJF (213 homologs found of 276 probesets included)</b>        |            |                                                                                                       |                        |               |           |              |              |
|                                                                                  | GO:0009892 | negative regulation of metabolic process                                                              | 2, 3, 4                | 1162          | 4         | 0.000        | 0.199        |
|                                                                                  | GO:0001574 | ganglioside biosynthetic process                                                                      | 7, 8, 9, 10            | 8             | 3         | 0.000        | 0.171        |
|                                                                                  | GO:0031324 | negative regulation of cellular metabolic process                                                     | 3, 4, 5                | 1085          | 4         | 0.000        | 0.169        |
|                                                                                  | GO:0010605 | negative regulation of macromolecule metabolic process                                                | 3, 4, 5                | 1057          | 4         | 0.000        | 0.176        |
|                                                                                  | GO:0006396 | RNA processing                                                                                        | 4, 5, 6, 7             | 569           | 19        | 0.000        | 0.178        |

|            |                                                                                                       |                        |      |    |       |       |
|------------|-------------------------------------------------------------------------------------------------------|------------------------|------|----|-------|-------|
| GO:0010165 | response to X-ray                                                                                     | 5                      | 26   | 4  | 0.000 | 0.171 |
| GO:0009890 | negative regulation of biosynthetic process                                                           | 3, 4, 5                | 906  | 3  | 0.001 | 0.160 |
| GO:0007186 | G-protein coupled receptor signaling pathway                                                          | 4, 5, 6                | 903  | 3  | 0.001 | 0.145 |
| GO:0007166 | cell surface receptor signaling pathway                                                               | 3, 4, 5                | 2224 | 17 | 0.001 | 0.138 |
| GO:0031327 | negative regulation of cellular biosynthetic process                                                  | 4, 5, 6                | 893  | 3  | 0.001 | 0.131 |
| GO:0045716 | positive regulation of low-density lipoprotein particle receptor biosynthetic process                 | 5, 6, 7, 8             | 3    | 2  | 0.001 | 0.123 |
| GO:0007005 | mitochondrion organization                                                                            | 5                      | 177  | 9  | 0.001 | 0.159 |
| GO:0051297 | centrosome organization                                                                               | 5, 6, 8                | 53   | 5  | 0.001 | 0.149 |
| GO:0001573 | ganglioside metabolic process                                                                         | 7, 8, 9                | 14   | 3  | 0.001 | 0.146 |
| GO:0010212 | response to ionizing radiation                                                                        | 4                      | 112  | 7  | 0.001 | 0.147 |
| GO:0010988 | regulation of low-density lipoprotein particle clearance                                              | 4, 5, 6                | 4    | 2  | 0.001 | 0.166 |
| GO:0072369 | regulation of lipid transport by positive regulation of transcription from RNA polymerase II promoter | 6, 7, 8, 9, 10, 11, 12 | 4    | 2  | 0.001 | 0.156 |
| GO:0006081 | cellular aldehyde metabolic process                                                                   | 3                      | 34   | 4  | 0.001 | 0.158 |
| GO:0071479 | cellular response to ionizing radiation                                                               | 5                      | 34   | 4  | 0.001 | 0.150 |
| GO:0031023 | microtubule organizing center organization                                                            | 4, 5, 7                | 58   | 5  | 0.001 | 0.144 |
| GO:0023052 | signaling                                                                                             | 1                      | 4227 | 44 | 0.001 | 0.144 |
| GO:0006688 | glycosphingolipid biosynthetic process                                                                | 6, 7, 8                | 16   | 3  | 0.001 | 0.139 |
| GO:0010558 | negative regulation of macromolecule biosynthetic process                                             | 4, 5, 6                | 821  | 3  | 0.001 | 0.134 |
| GO:0006672 | ceramide metabolic process                                                                            | 7, 8                   | 62   | 5  | 0.002 | 0.160 |
| GO:0007154 | cell communication                                                                                    | 2                      | 4327 | 46 | 0.002 | 0.161 |
| GO:0072367 | regulation of lipid transport by regulation of transcription from RNA polymerase II promoter          | 5, 6, 7, 8, 9, 10, 11  | 5    | 2  | 0.002 | 0.168 |
| GO:0006364 | rRNA processing                                                                                       | 6, 7, 8, 9             | 94   | 6  | 0.002 | 0.164 |
| GO:2000113 | negative regulation of cellular macromolecule biosynthetic process                                    | 5, 6, 7                | 781  | 3  | 0.002 | 0.175 |
| GO:0006397 | mRNA processing                                                                                       | 5, 6, 7, 8             | 332  | 12 | 0.002 | 0.171 |
| GO:0046519 | sphingoid metabolic process                                                                           | 6, 7                   | 66   | 5  | 0.002 | 0.167 |

**Higher DE genes in RJF (38 genes found of 52 probesets included)**

|            |                                                  |                        |     |   |       |              |
|------------|--------------------------------------------------|------------------------|-----|---|-------|--------------|
| GO:0035261 | <b>external genitalia morphogenesis</b>          | 4, 5, 6, 7             | 6   | 2 | 0.000 | 0.069        |
| GO:0061010 | gall bladder development                         | 4, 5                   | 6   | 2 | 0.000 | <b>0.035</b> |
| GO:0060324 | face development                                 | 3, 4                   | 42  | 3 | 0.000 | <b>0.037</b> |
| GO:0034086 | maintenance of sister chromatid cohesion         | 3, 4, 5, 7             | 8   | 2 | 0.000 | <b>0.032</b> |
| GO:0061038 | <b>uterus morphogenesis</b>                      | 3, 4, 5, 6             | 8   | 2 | 0.000 | <b>0.026</b> |
| GO:0034088 | maintenance of mitotic sister chromatid cohesion | 4, 5, 6, 7, 8, 9, 10   | 8   | 2 | 0.000 | <b>0.021</b> |
| GO:0071481 | cellular response to X-ray                       | 6                      | 9   | 2 | 0.000 | <b>0.024</b> |
| GO:0035117 | embryonic arm morphogenesis                      | 7, 8                   | 9   | 2 | 0.000 | <b>0.021</b> |
| GO:0035140 | arm morphogenesis                                | 6, 7                   | 9   | 2 | 0.000 | <b>0.018</b> |
| GO:0007064 | mitotic sister chromatid cohesion                | 4, 5, 6, 7, 8, 9       | 10  | 2 | 0.000 | <b>0.021</b> |
| GO:0031065 | positive regulation of histone deacetylation     | 6, 7, 8, 9, 10, 11, 12 | 11  | 2 | 0.000 | <b>0.023</b> |
| GO:0060322 | head development                                 | 3                      | 58  | 3 | 0.000 | <b>0.024</b> |
| GO:0090312 | positive regulation of protein deacetylation     | 6, 7, 8, 9             | 13  | 2 | 0.000 | <b>0.027</b> |
| GO:0048703 | embryonic viscerocranium morphogenesis           | 4, 5, 7, 8, 9          | 14  | 2 | 0.000 | <b>0.029</b> |
| GO:0031063 | regulation of histone deacetylation              | 6, 7, 8, 9, 11         | 15  | 2 | 0.001 | <b>0.032</b> |
| GO:0090311 | regulation of protein deacetylation              | 6, 7, 8                | 17  | 2 | 0.001 | <b>0.038</b> |
| GO:0060065 | <b>uterus development</b>                        | 4, 5                   | 18  | 2 | 0.001 | <b>0.040</b> |
| GO:0042634 | regulation of hair cycle                         | 3, 4                   | 18  | 2 | 0.001 | <b>0.038</b> |
| GO:0035112 | <b>genitalia morphogenesis</b>                   | 3, 4, 5, 6             | 18  | 2 | 0.001 | <b>0.036</b> |
| GO:0032800 | receptor biosynthetic process                    | 4, 5                   | 22  | 2 | 0.001 | 0.051        |
| GO:0048562 | embryonic organ morphogenesis                    | 4, 5, 6                | 211 | 4 | 0.001 | 0.055        |
| GO:0048557 | embryonic digestive tract morphogenesis          | 4, 5, 6, 7             | 24  | 2 | 0.001 | 0.056        |
| GO:0010165 | response to X-ray                                | 5                      | 26  | 2 | 0.002 | 0.062        |
| GO:0031058 | positive regulation of histone modification      | 5, 6, 7, 8, 9, 10, 11  | 28  | 2 | 0.002 | 0.069        |
| GO:0007548 | <b>sex differentiation</b>                       | 3, 4                   | 244 | 4 | 0.002 | 0.078        |
| GO:0042471 | ear morphogenesis                                | 5, 6, 7                | 114 | 3 | 0.002 | 0.075        |
| GO:0007062 | sister chromatid cohesion                        | 3, 4, 6                | 31  | 2 | 0.002 | 0.063        |
| GO:0035115 | embryonic forelimb morphogenesis                 | 6, 7                   | 31  | 2 | 0.002 | 0.061        |
| GO:0060325 | face morphogenesis                               | 3, 4, 5, 6             | 32  | 2 | 0.003 | 0.063        |
| GO:2001252 | positive regulation of chromosome organization   | 4, 5, 6, 7             | 32  | 2 | 0.003 | 0.062        |

**Lower DE genes in RJF (176 genes found of 224 probesets included)**

|            |                                                                         |            |      |    |       |       |
|------------|-------------------------------------------------------------------------|------------|------|----|-------|-------|
| GO:0009892 | negative regulation of metabolic process                                | 2, 3, 4    | 1162 | 2  | 0.000 | 0.078 |
| GO:0031324 | negative regulation of cellular metabolic process                       | 3, 4, 5    | 1085 | 2  | 0.000 | 0.094 |
| GO:0010605 | negative regulation of macromolecule metabolic process                  | 3, 4, 5    | 1057 | 2  | 0.000 | 0.065 |
| GO:0065007 | biological regulation                                                   | 1          | 7420 | 69 | 0.000 | 0.066 |
| GO:0051297 | centrosome organization                                                 | 5, 6, 8    | 53   | 5  | 0.000 | 0.105 |
| GO:0010556 | regulation of macromolecule biosynthetic process                        | 4, 5       | 2615 | 17 | 0.001 | 0.122 |
| GO:0031023 | microtubule organizing center organization                              | 4, 5, 7    | 58   | 5  | 0.001 | 0.105 |
| GO:0009889 | regulation of biosynthetic process                                      | 3, 4       | 2809 | 19 | 0.001 | 0.097 |
| GO:0007186 | G-protein coupled receptor signaling pathway                            | 4, 5, 6    | 903  | 2  | 0.001 | 0.102 |
| GO:0031326 | regulation of cellular biosynthetic process                             | 4, 5       | 2785 | 19 | 0.001 | 0.100 |
| GO:0006364 | rRNA processing                                                         | 6, 7, 8, 9 | 94   | 6  | 0.001 | 0.110 |
| GO:2000112 | regulation of cellular macromolecule biosynthetic process               | 5, 6       | 2556 | 17 | 0.001 | 0.109 |
| GO:0042254 | ribosome biogenesis                                                     | 5          | 131  | 7  | 0.001 | 0.104 |
| GO:0007154 | cell communication                                                      | 2          | 4327 | 36 | 0.001 | 0.100 |
| GO:0023052 | signaling                                                               | 1          | 4227 | 35 | 0.001 | 0.101 |
| GO:0006396 | RNA processing                                                          | 4, 5, 6, 7 | 569  | 16 | 0.001 | 0.097 |
| GO:0007005 | mitochondrion organization                                              | 5          | 177  | 8  | 0.001 | 0.103 |
| GO:0016072 | rRNA metabolic process                                                  | 6, 7, 8    | 101  | 6  | 0.001 | 0.105 |
| GO:0050794 | regulation of cellular process                                          | 2, 3       | 6661 | 64 | 0.001 | 0.114 |
| GO:0051172 | negative regulation of nitrogen compound metabolic process              | 3, 4, 5    | 827  | 2  | 0.002 | 0.119 |
| GO:0045934 | negative regulation of nucleobase-containing compound metabolic process | 4, 5, 6    | 819  | 2  | 0.002 | 0.124 |
| GO:0022900 | electron transport chain                                                | 3, 4       | 147  | 7  | 0.002 | 0.122 |
| GO:0050789 | regulation of biological process                                        | 1, 2       | 7035 | 69 | 0.002 | 0.120 |
| GO:0006281 | DNA repair                                                              | 5, 6, 7    | 392  | 12 | 0.002 | 0.139 |
| GO:0007166 | cell surface receptor signaling pathway                                 | 3, 4, 5    | 2224 | 15 | 0.002 | 0.143 |
| GO:0010468 | regulation of gene expression                                           | 4, 5       | 2700 | 20 | 0.002 | 0.147 |
| GO:0032502 | developmental process                                                   | 1          | 3808 | 32 | 0.002 | 0.143 |
| GO:0018130 | heterocycle biosynthetic process                                        | 4          | 355  | 11 | 0.003 | 0.167 |
| GO:0070841 | inclusion body assembly                                                 | 5          | 7    | 2  | 0.003 | 0.163 |
| GO:0022403 | cell cycle phase                                                        | 3, 4       | 756  | 18 | 0.003 | 0.160 |

**All DE genes in WL (165 homologs found of 204 probesets included)**

|            |                                                                                                       |                        |      |    |       |              |
|------------|-------------------------------------------------------------------------------------------------------|------------------------|------|----|-------|--------------|
| GO:0007166 | cell surface receptor signaling pathway                                                               | 3, 4, 5                | 2224 | 7  | 0.000 | <b>0.008</b> |
| GO:0065007 | biological regulation                                                                                 | 1                      | 7420 | 58 | 0.000 | <b>0.012</b> |
| GO:0050794 | regulation of cellular process                                                                        | 2, 3                   | 6661 | 53 | 0.000 | 0.068        |
| GO:0050789 | regulation of biological process                                                                      | 1, 2                   | 7035 | 58 | 0.000 | 0.085        |
| GO:0007154 | cell communication                                                                                    | 2                      | 4327 | 30 | 0.000 | 0.091        |
| GO:0045716 | positive regulation of low-density lipoprotein particle receptor biosynthetic process                 | 5, 6, 7, 8             | 3    | 2  | 0.000 | 0.093        |
| GO:0023052 | signaling                                                                                             | 1                      | 4227 | 30 | 0.000 | 0.105        |
| GO:0071479 | cellular response to ionizing radiation                                                               | 5                      | 34   | 4  | 0.001 | 0.099        |
| GO:0006081 | cellular aldehyde metabolic process                                                                   | 3                      | 34   | 4  | 0.001 | 0.089        |
| GO:0000086 | G2/M transition of mitotic cell cycle                                                                 | 3, 4, 5, 6, 7          | 135  | 7  | 0.001 | 0.109        |
| GO:0072369 | regulation of lipid transport by positive regulation of transcription from RNA polymerase II promoter | 6, 7, 8, 9, 10, 11, 12 | 4    | 2  | 0.001 | 0.107        |
| GO:0010988 | regulation of low-density lipoprotein particle clearance                                              | 4, 5, 6                | 4    | 2  | 0.001 | 0.099        |
| GO:0006974 | response to DNA damage stimulus                                                                       | 4                      | 560  | 15 | 0.001 | 0.131        |
| GO:0072367 | regulation of lipid transport by regulation of transcription from RNA polymerase II promoter          | 5, 6, 7, 8, 9, 10, 11  | 5    | 2  | 0.001 | 0.141        |
| GO:0022403 | cell cycle phase                                                                                      | 3, 4                   | 756  | 18 | 0.001 | 0.137        |
| GO:0010212 | response to ionizing radiation                                                                        | 4                      | 112  | 6  | 0.001 | 0.142        |
| GO:0010984 | regulation of lipoprotein particle clearance                                                          | 3, 4, 5                | 6    | 2  | 0.002 | 0.175        |
| GO:0061010 | gall bladder development                                                                              | 4, 5                   | 6    | 2  | 0.002 | 0.166        |

|            |                                                                              |            |      |    |       |       |
|------------|------------------------------------------------------------------------------|------------|------|----|-------|-------|
| GO:0035261 | <b>external genitalia morphogenesis</b>                                      | 4, 5, 6, 7 | 6    | 2  | 0.002 | 0.157 |
| GO:0033554 | cellular response to stress                                                  | 3          | 991  | 21 | 0.002 | 0.167 |
| GO:0048583 | regulation of response to stimulus                                           | 2, 3       | 1881 | 10 | 0.002 | 0.163 |
| GO:0046487 | glyoxylate metabolic process                                                 | 4, 7       | 7    | 2  | 0.002 | 0.189 |
| GO:0045714 | regulation of low-density lipoprotein particle receptor biosynthetic process | 5, 6, 7    | 7    | 2  | 0.002 | 0.181 |
| GO:0070841 | inclusion body assembly                                                      | 5          | 7    | 2  | 0.002 | 0.174 |
| GO:0007165 | signal transduction                                                          | 2, 3, 4    | 3830 | 29 | 0.003 | 0.171 |
| GO:0009889 | regulation of biosynthetic process                                           | 3, 4       | 2809 | 19 | 0.003 | 0.176 |
| GO:0000278 | mitotic cell cycle                                                           | 3          | 688  | 16 | 0.003 | 0.172 |
| GO:0010468 | regulation of gene expression                                                | 4, 5       | 2700 | 18 | 0.003 | 0.168 |
| GO:0010165 | response to X-ray                                                            | 5          | 26   | 3  | 0.003 | 0.163 |
| GO:0042254 | ribosome biogenesis                                                          | 5          | 131  | 6  | 0.003 | 0.165 |

**Higher DE genes in WL (32 genes found of 41 probesets included)**

|            |                                                      |                        |     |   |       |              |
|------------|------------------------------------------------------|------------------------|-----|---|-------|--------------|
| GO:0040018 | positive regulation of multicellular organism growth | 3, 4, 5                | 34  | 3 | 0.000 | <b>0.026</b> |
| GO:0061010 | gall bladder development                             | 4, 5                   | 6   | 2 | 0.000 | <b>0.019</b> |
| GO:0035261 | <b>external genitalia morphogenesis</b>              | 4, 5, 6, 7             | 6   | 2 | 0.000 | <b>0.013</b> |
| GO:0034086 | maintenance of sister chromatid cohesion             | 3, 4, 5, 7             | 8   | 2 | 0.000 | <b>0.018</b> |
| GO:0061038 | <b>uterus morphogenesis</b>                          | 3, 4, 5, 6             | 8   | 2 | 0.000 | <b>0.014</b> |
| GO:0034088 | maintenance of mitotic sister chromatid cohesion     | 4, 5, 6, 7, 8, 9, 10   | 8   | 2 | 0.000 | <b>0.012</b> |
| GO:0071481 | cellular response to X-ray                           | 6                      | 9   | 2 | 0.000 | <b>0.013</b> |
| GO:0035117 | embryonic arm morphogenesis                          | 7, 8                   | 9   | 2 | 0.000 | <b>0.011</b> |
| GO:0035140 | arm morphogenesis                                    | 6, 7                   | 9   | 2 | 0.000 | <b>0.010</b> |
| GO:0007064 | mitotic sister chromatid cohesion                    | 4, 5, 6, 7, 8, 9       | 10  | 2 | 0.000 | <b>0.011</b> |
| GO:0031065 | positive regulation of histone deacetylation         | 6, 7, 8, 9, 10, 11, 12 | 11  | 2 | 0.000 | <b>0.013</b> |
| GO:0090312 | positive regulation of protein deacetylation         | 6, 7, 8, 9             | 13  | 2 | 0.000 | <b>0.016</b> |
| GO:0048703 | embryonic viscerocranium morphogenesis               | 4, 5, 7, 8, 9          | 14  | 2 | 0.000 | <b>0.017</b> |
| GO:0031063 | regulation of histone deacetylation                  | 6, 7, 8, 9, 11         | 15  | 2 | 0.000 | <b>0.019</b> |
| GO:0090311 | regulation of protein deacetylation                  | 6, 7, 8                | 17  | 2 | 0.000 | <b>0.023</b> |
| GO:0040014 | regulation of multicellular organism growth          | 3, 4                   | 81  | 3 | 0.000 | <b>0.021</b> |
| GO:0060065 | <b>uterus development</b>                            | 4, 5                   | 18  | 2 | 0.001 | <b>0.022</b> |
| GO:0035112 | <b>genitalia morphogenesis</b>                       | 3, 4, 5, 6             | 18  | 2 | 0.001 | <b>0.021</b> |
| GO:0042634 | regulation of hair cycle                             | 3, 4                   | 18  | 2 | 0.001 | <b>0.020</b> |
| GO:0048557 | embryonic digestive tract morphogenesis              | 4, 5, 6, 7             | 24  | 2 | 0.001 | <b>0.034</b> |
| GO:0010165 | response to X-ray                                    | 5                      | 26  | 2 | 0.001 | <b>0.038</b> |
| GO:0048638 | regulation of developmental growth                   | 3, 4                   | 110 | 3 | 0.001 | <b>0.037</b> |
| GO:0031058 | positive regulation of histone modification          | 5, 6, 7, 8, 9, 10, 11  | 28  | 2 | 0.001 | <b>0.040</b> |
| GO:0007062 | sister chromatid cohesion                            | 3, 4, 6                | 31  | 2 | 0.002 | <b>0.047</b> |
| GO:0035115 | embryonic forelimb morphogenesis                     | 6, 7                   | 31  | 2 | 0.002 | <b>0.045</b> |
| GO:2001252 | positive regulation of chromosome organization       | 4, 5, 6, 7             | 32  | 2 | 0.002 | <b>0.046</b> |
| GO:0060325 | <b>face morphogenesis</b>                            | 3, 4, 5, 6             | 32  | 2 | 0.002 | <b>0.044</b> |
| GO:0000279 | M phase                                              | 4, 5                   | 477 | 5 | 0.002 | <b>0.044</b> |
| GO:0035264 | multicellular organism growth                        | 2                      | 131 | 3 | 0.002 | <b>0.046</b> |
| GO:0071479 | cellular response to ionizing radiation              | 5                      | 34  | 2 | 0.002 | <b>0.045</b> |
| GO:0016575 | histone deacetylation                                | 7, 8, 10               | 35  | 2 | 0.002 | <b>0.045</b> |
| GO:0048701 | <b>embryonic cranial skeleton morphogenesis</b>      | 6, 7, 8                | 37  | 2 | 0.002 | <b>0.048</b> |
| GO:0060323 | <b>head morphogenesis</b>                            | 3, 4, 5                | 38  | 2 | 0.002 | <b>0.049</b> |
| GO:0045927 | positive regulation of growth                        | 2, 3, 4                | 143 | 3 | 0.002 | <b>0.049</b> |

**Lower DE genes in RJF (134 genes found of 163 probesets included)**

|            |                                                                |               |      |    |       |              |
|------------|----------------------------------------------------------------|---------------|------|----|-------|--------------|
| GO:0065007 | biological regulation                                          | 1             | 7420 | 43 | 0.000 | <b>0.002</b> |
| GO:0050794 | regulation of cellular process                                 | 2, 3          | 6661 | 39 | 0.000 | <b>0.009</b> |
| GO:0050789 | regulation of biological process                               | 1, 2          | 7035 | 43 | 0.000 | <b>0.010</b> |
| GO:0007166 | cell surface receptor signaling pathway                        | 3, 4, 5       | 2224 | 6  | 0.000 | <b>0.015</b> |
| GO:0006081 | cellular aldehyde metabolic process                            | 3             | 34   | 4  | 0.000 | 0.083        |
| GO:0010468 | regulation of gene expression                                  | 4, 5          | 2700 | 11 | 0.000 | 0.073        |
| GO:0009889 | regulation of biosynthetic process                             | 3, 4          | 2809 | 12 | 0.000 | 0.076        |
| GO:0007154 | cell communication                                             | 2             | 4327 | 24 | 0.000 | 0.078        |
| GO:0031326 | regulation of cellular biosynthetic process                    | 4, 5          | 2785 | 12 | 0.000 | 0.069        |
| GO:0048583 | regulation of response to stimulus                             | 2, 3          | 1881 | 6  | 0.001 | 0.081        |
| GO:0031323 | regulation of cellular metabolic process                       | 3, 4          | 3653 | 19 | 0.001 | 0.076        |
| GO:0023052 | signaling                                                      | 1             | 4227 | 24 | 0.001 | 0.089        |
| GO:0006281 | DNA repair                                                     | 5, 6, 7       | 392  | 11 | 0.001 | 0.102        |
| GO:0019222 | regulation of metabolic process                                | 2, 3          | 4057 | 23 | 0.001 | 0.099        |
| GO:0080090 | regulation of primary metabolic process                        | 3, 4          | 3560 | 19 | 0.001 | 0.094        |
| GO:0051171 | regulation of nitrogen compound metabolic process              | 3, 4          | 2908 | 14 | 0.001 | 0.094        |
| GO:2001141 | regulation of RNA biosynthetic process                         | 5, 6, 7, 8    | 2358 | 10 | 0.001 | 0.096        |
| GO:0010556 | regulation of macromolecule biosynthetic process               | 4, 5          | 2615 | 12 | 0.001 | 0.099        |
| GO:0006355 | regulation of transcription, DNA-dependent                     | 5, 6, 7, 8, 9 | 2341 | 10 | 0.001 | 0.095        |
| GO:0042254 | ribosome biogenesis                                            | 5             | 131  | 6  | 0.001 | 0.098        |
| GO:0032501 | multicellular organismal process                               | 1             | 4702 | 29 | 0.001 | 0.095        |
| GO:0006351 | transcription, DNA-dependent                                   | 4, 5, 6, 7, 8 | 2458 | 11 | 0.001 | 0.092        |
| GO:0000086 | G2/M transition of mitotic cell cycle                          | 3, 4, 5, 6, 7 | 135  | 6  | 0.001 | 0.099        |
| GO:0019219 | regulation of nucleobase-containing compound metabolic process | 4, 5          | 2832 | 14 | 0.001 | 0.097        |
| GO:2000112 | regulation of cellular macromolecule biosynthetic process      | 5, 6          | 2556 | 12 | 0.002 | 0.097        |
| GO:0006364 | rRNA processing                                                | 6, 7, 8, 9    | 94   | 5  | 0.002 | 0.097        |
| GO:0032502 | developmental process                                          | 1             | 3808 | 22 | 0.002 | 0.095        |
| GO:0006396 | RNA processing                                                 | 4, 5, 6, 7    | 569  | 13 | 0.002 | 0.096        |
| GO:0051252 | regulation of RNA metabolic process                            | 4, 5, 6, 7    | 2404 | 11 | 0.002 | 0.093        |
| GO:0070841 | inclusion body assembly                                        | 5             | 7    | 2  | 0.002 | 0.090        |

Analysis was performed with human homologs using the Manteia web tool.
