# Supplementary material for: Large Sex Differences in Chicken Behavior and Brain Gene Expression Coincide with Few Differences in Promoter DNA-Methylation
Source: PubMed Central journal article supplement (PMC4004567; doi:10.1371/journal.pone.0096376), 2014-04-29
Supplement: pone.0096376.s005.pdf [file pone.0096376.s005.pdf]

**Table S4.** Gene ontology analysis of significantly differentially methylated (DM) promoters in females related to males, given as a 30 toplist within different categories.

| Category                                                                        | GO ID      | GO term                                                      | GO Level | Occurrence in  |           | Significance |                    |
|---------------------------------------------------------------------------------|------------|--------------------------------------------------------------|----------|----------------|-----------|--------------|--------------------|
|                                                                                 |            |                                                              |          | Reference      | Test list | Pval.        | Pval. FDR-BH       |
| <b>All DM promoters across breeds (30 homologs found of 55 loci included)</b>   |            |                                                              |          |                |           |              |                    |
|                                                                                 | GO:0018345 | protein palmitoylation                                       |          | 7              | 10        | 2            | 0.000 0.204        |
|                                                                                 | GO:0009615 | response to virus                                            |          | 3, 4           | 200       | 4            | 0.001 0.381        |
|                                                                                 | GO:0007281 | germ cell development                                        |          | 3, 4, 5        | 133       | 3            | 0.002 0.128        |
|                                                                                 | GO:0009994 | <b>oocyte differentiation</b>                                |          | 3, 4, 6, 7     | 36        | 2            | 0.002 0.124        |
|                                                                                 | GO:0048599 | <b>oocyte development</b>                                    |          | 4, 5, 6, 7, 8  | 36        | 2            | 0.002 0.118        |
|                                                                                 | GO:0009607 | response to biotic stimulus                                  |          | 2              | 485       | 5            | 0.003 0.119        |
|                                                                                 | GO:0008637 | apoptotic mitochondrial changes                              |          | 5, 6           | 40        | 2            | 0.003 0.134        |
|                                                                                 | GO:0016044 | cellular membrane organization                               |          | 2, 4           | 320       | 4            | 0.004 0.156        |
|                                                                                 | GO:0061024 | membrane organization                                        |          | 3              | 322       | 4            | 0.004 0.153        |
|                                                                                 | GO:0006497 | protein lipidation                                           |          | 6              | 46        | 2            | 0.004 0.156        |
|                                                                                 | GO:0001658 | <b>branching involved in ureteric bud morphogenesis</b>      |          | 4, 5, 6, 7, 8  | 49        | 2            | 0.005 0.118        |
|                                                                                 | GO:0002376 | immune system process                                        |          | 1              | 1383      | 8            | 0.005 0.116        |
|                                                                                 | GO:0042158 | lipoprotein biosynthetic process                             |          | 5              | 50        | 2            | 0.005 0.117        |
|                                                                                 | GO:0060675 | <b>ureteric bud morphogenesis</b>                            |          | 5, 6, 7        | 56        | 2            | 0.006 0.142        |
|                                                                                 | GO:0048477 | <b>oogenesis</b>                                             |          | 5, 6           | 57        | 2            | 0.006 0.144        |
|                                                                                 | GO:0006921 | cellular component disassembly involved in apoptotic process |          | 5              | 68        | 2            | 0.008 0.142        |
|                                                                                 | GO:0007276 | <b>gamete generation</b>                                     |          | 3, 4           | 415       | 4            | 0.009 0.146        |
|                                                                                 | GO:0033077 | T cell differentiation in thymus                             |          | 6, 7, 8, 9, 10 | 71        | 2            | 0.009 0.149        |
|                                                                                 | GO:0032501 | multicellular organismal process                             |          | 1              | 4702      | 16           | 0.009 0.152        |
|                                                                                 | GO:0072006 | nephron development                                          |          | 3, 5, 6, 7     | 73        | 2            | 0.010 0.153        |
|                                                                                 | GO:0022037 | metencephalon development                                    |          | 3, 4, 6, 7, 8  | 74        | 2            | 0.010 0.155        |
|                                                                                 | GO:0071845 | cellular component disassembly at cellular level             |          | 4              | 227       | 3            | 0.010 0.159        |
|                                                                                 | GO:0042157 | lipoprotein metabolic process                                |          | 4              | 77        | 2            | 0.011 0.140        |
|                                                                                 | GO:0022411 | cellular component disassembly                               |          | 3              | 230       | 3            | 0.011 0.139        |
|                                                                                 | GO:0001656 | metanephros development                                      |          | 5, 6, 7        | 80        | 2            | 0.011 0.147        |
|                                                                                 | GO:0051707 | response to other organism                                   |          | 2, 3           | 460       | 4            | 0.012 0.156        |
|                                                                                 | GO:0019953 | <b>sexual reproduction</b>                                   |          | 2              | 469       | 4            | 0.013 0.143        |
|                                                                                 | GO:0016050 | vesicle organization                                         |          | 5              | 86        | 2            | 0.013 0.142        |
|                                                                                 | GO:0007292 | <b>female gamete generation</b>                              |          | 4, 5           | 87        | 2            | 0.013 0.143        |
|                                                                                 | GO:0008543 | fibroblast growth factor receptor signaling pathway          |          | 5, 6, 7, 8     | 89        | 2            | 0.014 0.148        |
| <b>Hypo DM promoters across breeds (8 homologs found of 24 loci included)</b>   |            |                                                              |          |                |           |              |                    |
|                                                                                 | GO:0018345 | protein palmitoylation                                       |          | 7              | 10        | 2            | 0.000 <b>0.018</b> |
|                                                                                 | GO:0006497 | protein lipidation                                           |          | 6              | 46        | 2            | 0.001 0.205        |
|                                                                                 | GO:0042158 | lipoprotein biosynthetic process                             |          | 5              | 50        | 2            | 0.001 0.162        |
|                                                                                 | GO:0042157 | lipoprotein metabolic process                                |          | 4              | 77        | 2            | 0.002 <b>0.047</b> |
|                                                                                 | GO:0008543 | fibroblast growth factor receptor signaling pathway          |          | 5, 6, 7, 8     | 89        | 2            | 0.003 0.060        |
|                                                                                 | GO:0071774 | response to fibroblast growth factor stimulus                |          | 3, 5           | 105       | 2            | 0.003 0.058        |
|                                                                                 | GO:0044344 | cellular response to fibroblast growth factor stimulus       |          | 4, 6           | 105       | 2            | 0.003 0.056        |
|                                                                                 | GO:0043543 | protein acylation                                            |          | 6              | 123       | 2            | 0.005 0.063        |
|                                                                                 | GO:0007281 | germ cell development                                        |          | 3, 4, 5        | 133       | 2            | 0.005 0.061        |
|                                                                                 | GO:0008219 | cell death                                                   |          | 2              | 1548      | 5            | 0.006 0.065        |
|                                                                                 | GO:0016265 | death                                                        |          | 1              | 1551      | 5            | 0.006 0.064        |
|                                                                                 | GO:0009607 | response to biotic stimulus                                  |          | 2              | 485       | 3            | 0.007 0.067        |
|                                                                                 | GO:0009615 | response to virus                                            |          | 3, 4           | 200       | 2            | 0.012 0.082        |
|                                                                                 | GO:0071363 | cellular response to growth factor stimulus                  |          | 5              | 212       | 2            | 0.013 0.087        |
|                                                                                 | GO:0070848 | response to growth factor stimulus                           |          | 4              | 226       | 2            | 0.015 0.090        |
|                                                                                 | GO:0022607 | cellular component assembly                                  |          | 3              | 1275      | 4            | 0.016 0.094        |
|                                                                                 | GO:0044085 | cellular component biogenesis                                |          | 2              | 1394      | 4            | 0.022 0.110        |
|                                                                                 | GO:0016044 | cellular membrane organization                               |          | 2, 4           | 320       | 2            | 0.028 0.124        |
|                                                                                 | GO:0061024 | membrane organization                                        |          | 3              | 322       | 2            | 0.028 0.121        |
|                                                                                 | GO:0071310 | cellular response to organic substance                       |          | 4              | 848       | 3            | 0.028 0.122        |
|                                                                                 | GO:0051704 | multi-organism process                                       |          | 1              | 870       | 3            | 0.030 0.128        |
|                                                                                 | GO:0071844 | cellular component assembly at cellular level                |          | 4              | 940       | 3            | 0.036 0.140        |
|                                                                                 | GO:0055114 | oxidation-reduction process                                  |          | 2              | 946       | 3            | 0.037 0.140        |
|                                                                                 | GO:0003006 | <b>developmental process involved in reproduction</b>        |          | 2, 3           | 402       | 2            | 0.041 0.147        |
|                                                                                 | GO:0007276 | <b>gamete generation</b>                                     |          | 3, 4           | 415       | 2            | 0.044 0.152        |
|                                                                                 | GO:0045087 | innate immune response                                       |          | 3, 4           | 441       | 2            | 0.048 0.157        |
|                                                                                 | GO:0051707 | response to other organism                                   |          | 2, 3           | 460       | 2            | 0.052 0.165        |
|                                                                                 | GO:0019953 | <b>sexual reproduction</b>                                   |          | 2              | 469       | 2            | 0.053 0.168        |
|                                                                                 | GO:0006184 | GTP catabolic process                                        |          | 9, 10, 11, 12  | 470       | 2            | 0.054 0.168        |
|                                                                                 | GO:0046039 | GTP metabolic process                                        |          | 8, 9, 10, 11   | 482       | 2            | 0.056 0.169        |
| <b>Hyper DM promoters across breeds (18 homologs found of 31 loci included)</b> |            |                                                              |          |                |           |              |                    |
|                                                                                 | GO:0032501 | multicellular organismal process                             |          | 1              | 4702      | 13           | 0.000 0.277        |
|                                                                                 | GO:0022037 | metencephalon development                                    |          | 3, 4, 6, 7, 8  | 74        | 2            | 0.004 0.214        |
|                                                                                 | GO:0016050 | vesicle organization                                         |          | 5              | 86        | 2            | 0.005 0.248        |
|                                                                                 | GO:0001701 | in utero embryonic development                               |          | 6              | 308       | 3            | 0.005 0.185        |
|                                                                                 | GO:0030902 | hindbrain development                                        |          | 3, 5, 6, 7     | 112       | 2            | 0.008 0.186        |
|                                                                                 | GO:0051607 | defense response to virus                                    |          | 3, 4, 5        | 120       | 2            | 0.009 0.159        |
|                                                                                 | GO:0007275 | multicellular organismal development                         |          | 2              | 3449      | 9            | 0.009 0.156        |
|                                                                                 | GO:0042113 | B cell activation                                            |          | 4, 5           | 146       | 2            | 0.013 0.177        |
|                                                                                 | GO:0032502 | developmental process                                        |          | 1              | 3808      | 9            | 0.016 0.213        |
|                                                                                 | GO:0002376 | immune system process                                        |          | 1              | 1383      | 5            | 0.017 0.203        |
|                                                                                 | GO:0043009 | chordate embryonic development                               |          | 5              | 499       | 3            | 0.019 0.219        |
|                                                                                 | GO:0009792 | embryo development ending in birth or egg hatching           |          | 4              | 511       | 3            | 0.020 0.222        |
|                                                                                 | GO:0055085 | transmembrane transport                                      |          | 2, 3, 4        | 944       | 4            | 0.020 0.223        |
|                                                                                 | GO:0006811 | ion transport                                                |          | 3, 4           | 945       | 4            | 0.020 0.220        |
|                                                                                 | GO:0034645 | cellular macromolecule biosynthetic process                  |          | 4              | 3279      | 8            | 0.021 0.219        |
|                                                                                 | GO:0009615 | response to virus                                            |          | 3, 4           | 200       | 2            | 0.023 0.229        |
|                                                                                 | GO:0009059 | macromolecule biosynthetic process                           |          | 3              | 3354      | 8            | 0.023 0.225        |
|                                                                                 | GO:0001666 | response to hypoxia                                          |          | 3, 4           | 206       | 2            | 0.024 0.227        |
|                                                                                 | GO:0050900 | leukocyte migration                                          |          | 2, 4, 5        | 209       | 2            | 0.025 0.220        |
|                                                                                 | GO:0034641 | cellular nitrogen compound metabolic process                 |          | 3              | 4837      | 10           | 0.026 0.213        |
|                                                                                 | GO:0044249 | cellular biosynthetic process                                |          | 3              | 4123      | 9            | 0.026 0.214        |
|                                                                                 | GO:0010467 | gene expression                                              |          | 3              | 3426      | 8            | 0.026 0.212        |
|                                                                                 | GO:0070482 | response to oxygen levels                                    |          | 3              | 222       | 2            | 0.027 0.215        |

|            |                                                  |      |      |    |       |       |
|------------|--------------------------------------------------|------|------|----|-------|-------|
| GO:0040011 | locomotion                                       | 1    | 1048 | 4  | 0.028 | 0.215 |
| GO:0071845 | cellular component disassembly at cellular level | 4    | 227  | 2  | 0.028 | 0.217 |
| GO:0006807 | nitrogen compound metabolic process              | 2    | 4924 | 10 | 0.029 | 0.217 |
| GO:0022411 | cellular component disassembly                   | 3    | 230  | 2  | 0.029 | 0.208 |
| GO:0009058 | biosynthetic process                             | 2    | 4217 | 9  | 0.030 | 0.210 |
| GO:0090304 | nucleic acid metabolic process                   | 4, 5 | 3542 | 8  | 0.031 | 0.210 |
| GO:0006139 | nucleobase-containing compound metabolic process | 3, 4 | 4432 | 9  | 0.039 | 0.218 |

**All DM promoters in RJF ( 12 homologs found of 22 loci included)**

|            |                                                           |               |      |   |       |       |
|------------|-----------------------------------------------------------|---------------|------|---|-------|-------|
| GO:0001701 | in utero embryonic development                            | 6             | 308  | 3 | 0.002 | 0.118 |
| GO:0032501 | multicellular organismal process                          | 1             | 4702 | 9 | 0.004 | 0.135 |
| GO:0043009 | chordate embryonic development                            | 5             | 499  | 3 | 0.007 | 0.121 |
| GO:0009792 | embryo development ending in birth or egg hatching        | 4             | 511  | 3 | 0.008 | 0.118 |
| GO:0009790 | embryo development                                        | 3             | 854  | 3 | 0.029 | 0.249 |
| GO:0055085 | transmembrane transport                                   | 2, 3, 4       | 944  | 3 | 0.037 | 0.277 |
| GO:0006811 | ion transport                                             | 3, 4          | 945  | 3 | 0.037 | 0.266 |
| GO:0032774 | RNA biosynthetic process                                  | 4, 5, 6, 7    | 2529 | 5 | 0.039 | 0.271 |
| GO:0007275 | multicellular organismal development                      | 2             | 3449 | 6 | 0.039 | 0.263 |
| GO:0006366 | transcription from RNA polymerase II promoter             | 5, 6, 7, 8, 9 | 1100 | 3 | 0.052 | 0.314 |
| GO:0032502 | developmental process                                     | 1             | 3808 | 6 | 0.058 | 0.326 |
| GO:0016070 | RNA metabolic process                                     | 4, 5, 6       | 3071 | 5 | 0.073 | 0.339 |
| GO:0065008 | regulation of biological quality                          | 2             | 2200 | 4 | 0.079 | 0.339 |
| GO:0034645 | cellular macromolecule biosynthetic process               | 4             | 3279 | 5 | 0.088 | 0.334 |
| GO:0006355 | regulation of transcription, DNA-dependent                | 5, 6, 7, 8, 9 | 2341 | 4 | 0.091 | 0.331 |
| GO:2001141 | regulation of RNA biosynthetic process                    | 5, 6, 7, 8    | 2358 | 4 | 0.093 | 0.330 |
| GO:0009059 | macromolecule biosynthetic process                        | 3             | 3354 | 5 | 0.094 | 0.328 |
| GO:0051252 | regulation of RNA metabolic process                       | 4, 5, 6, 7    | 2404 | 4 | 0.097 | 0.326 |
| GO:0010467 | gene expression                                           | 3             | 3426 | 5 | 0.100 | 0.329 |
| GO:0048878 | chemical homeostasis                                      | 4             | 700  | 2 | 0.100 | 0.318 |
| GO:0006351 | transcription, DNA-dependent                              | 4, 5, 6, 7, 8 | 2458 | 4 | 0.102 | 0.299 |
| GO:0006812 | cation transport                                          | 4, 5          | 726  | 2 | 0.106 | 0.299 |
| GO:0090304 | nucleic acid metabolic process                            | 4, 5          | 3542 | 5 | 0.109 | 0.299 |
| GO:2000112 | regulation of cellular macromolecule biosynthetic process | 5, 6          | 2556 | 4 | 0.112 | 0.298 |
| GO:0010556 | regulation of macromolecule biosynthetic process          | 4, 5          | 2615 | 4 | 0.118 | 0.295 |
| GO:0050896 | response to stimulus                                      | 1             | 5834 | 3 | 0.121 | 0.299 |
| GO:0010468 | regulation of gene expression                             | 4, 5          | 2700 | 4 | 0.126 | 0.299 |
| GO:0034641 | cellular nitrogen compound metabolic process              | 3             | 4837 | 6 | 0.127 | 0.298 |
| GO:0051716 | cellular response to stimulus                             | 2             | 4600 | 2 | 0.129 | 0.296 |
| GO:0006807 | nitrogen compound metabolic process                       | 2             | 4924 | 6 | 0.133 | 0.297 |

**Hypo DM promoters in RJF ( 3 homologs found of 9 loci included)\***

|            |                                  |   |       |   |       |       |
|------------|----------------------------------|---|-------|---|-------|-------|
| GO:0048878 | chemical homeostasis             | 4 | 700   | 2 | 0.007 | 0.087 |
| GO:0042592 | homeostatic process              | 3 | 1010  | 2 | 0.015 | 0.110 |
| GO:0065008 | regulation of biological quality | 2 | 2200  | 2 | 0.063 | 0.190 |
| GO:0065007 | biological regulation            | 1 | 7420  | 2 | 0.399 | 0.521 |
| GO:0009987 | cellular process                 | 1 | 10797 | 2 | 0.403 | 0.514 |
| GO:0008152 | metabolic process                | 1 | 8358  | 2 | 0.433 | 0.472 |

**Hyper DM promoter in RJF ( 9 homologs found of 13 loci included)**

|            |                                                                |               |      |   |       |              |
|------------|----------------------------------------------------------------|---------------|------|---|-------|--------------|
| GO:0001701 | in utero embryonic development                                 | 6             | 308  | 3 | 0.001 | 0.058        |
| GO:0032501 | multicellular organismal process                               | 1             | 4702 | 8 | 0.001 | <b>0.050</b> |
| GO:0043009 | chordate embryonic development                                 | 5             | 499  | 3 | 0.003 | 0.076        |
| GO:0009792 | embryo development ending in birth or egg hatching             | 4             | 511  | 3 | 0.003 | 0.061        |
| GO:0007275 | multicellular organismal development                           | 2             | 3449 | 6 | 0.008 | 0.094        |
| GO:0032774 | RNA biosynthetic process                                       | 4, 5, 6, 7    | 2529 | 5 | 0.011 | 0.110        |
| GO:0009790 | embryo development                                             | 3             | 854  | 3 | 0.013 | 0.115        |
| GO:0032502 | developmental process                                          | 1             | 3808 | 6 | 0.014 | 0.105        |
| GO:0016070 | RNA metabolic process                                          | 4, 5, 6       | 3071 | 5 | 0.025 | 0.163        |
| GO:0006366 | transcription from RNA polymerase II promoter                  | 5, 6, 7, 8, 9 | 1100 | 3 | 0.025 | 0.162        |
| GO:0034645 | cellular macromolecule biosynthetic process                    | 4             | 3279 | 5 | 0.032 | 0.184        |
| GO:0009059 | macromolecule biosynthetic process                             | 3             | 3354 | 5 | 0.034 | 0.193        |
| GO:0010467 | gene expression                                                | 3             | 3426 | 5 | 0.037 | 0.201        |
| GO:0006355 | regulation of transcription, DNA-dependent                     | 5, 6, 7, 8, 9 | 2341 | 4 | 0.041 | 0.211        |
| GO:2001141 | regulation of RNA biosynthetic process                         | 5, 6, 7, 8    | 2358 | 4 | 0.041 | 0.208        |
| GO:0034641 | cellular nitrogen compound metabolic process                   | 3             | 4837 | 6 | 0.042 | 0.203        |
| GO:0090304 | nucleic acid metabolic process                                 | 4, 5          | 3542 | 5 | 0.042 | 0.198        |
| GO:0051252 | regulation of RNA metabolic process                            | 4, 5, 6, 7    | 2404 | 4 | 0.044 | 0.194        |
| GO:0006807 | nitrogen compound metabolic process                            | 2             | 4924 | 6 | 0.045 | 0.193        |
| GO:0006351 | transcription, DNA-dependent                                   | 4, 5, 6, 7, 8 | 2458 | 4 | 0.047 | 0.195        |
| GO:2000112 | regulation of cellular macromolecule biosynthetic process      | 5, 6          | 2556 | 4 | 0.052 | 0.207        |
| GO:0010556 | regulation of macromolecule biosynthetic process               | 4, 5          | 2615 | 4 | 0.056 | 0.215        |
| GO:0010468 | regulation of gene expression                                  | 4, 5          | 2700 | 4 | 0.061 | 0.213        |
| GO:0031326 | regulation of cellular biosynthetic process                    | 4, 5          | 2785 | 4 | 0.067 | 0.216        |
| GO:0009889 | regulation of biosynthetic process                             | 3, 4          | 2809 | 4 | 0.068 | 0.217        |
| GO:0019219 | regulation of nucleobase-containing compound metabolic process | 4, 5          | 2832 | 4 | 0.070 | 0.212        |
| GO:0044249 | cellular biosynthetic process                                  | 3             | 4123 | 5 | 0.071 | 0.212        |
| GO:0051171 | regulation of nitrogen compound metabolic process              | 3, 4          | 2908 | 4 | 0.075 | 0.219        |
| GO:0009058 | biosynthetic process                                           | 2             | 4217 | 5 | 0.077 | 0.220        |
| GO:0006139 | nucleobase-containing compound metabolic process               | 3, 4          | 4432 | 5 | 0.090 | 0.212        |

**All DM promoters in WL ( 12 homologs found of 22 loci included)**

|            |                                                  |               |     |   |       |       |
|------------|--------------------------------------------------|---------------|-----|---|-------|-------|
| GO:0018345 | protein palmitoylation                           | 7             | 10  | 2 | 0.000 | 0.121 |
| GO:0009615 | response to virus                                | 3, 4          | 200 | 4 | 0.000 | 0.146 |
| GO:0007281 | germ cell development                            | 3, 4, 5       | 133 | 3 | 0.001 | 0.435 |
| GO:0048599 | <b>oocyte development</b>                        | 4, 5, 6, 7, 8 | 36  | 2 | 0.002 | 0.406 |
| GO:0009994 | <b>oocyte differentiation</b>                    | 3, 4, 6, 7    | 36  | 2 | 0.002 | 0.325 |
| GO:0016044 | cellular membrane organization                   | 2, 4          | 320 | 4 | 0.002 | 0.273 |
| GO:0061024 | membrane organization                            | 3             | 322 | 4 | 0.002 | 0.239 |
| GO:0008637 | apoptotic mitochondrial changes                  | 5, 6          | 40  | 2 | 0.002 | 0.080 |
| GO:0006497 | protein lipidation                               | 6             | 46  | 2 | 0.003 | 0.101 |
| GO:0001658 | branching involved in ureteric bud morphogenesis | 4, 5, 6, 7, 8 | 49  | 2 | 0.003 | 0.110 |
| GO:0042158 | lipoprotein biosynthetic process                 | 5             | 50  | 2 | 0.003 | 0.110 |
| GO:0060675 | <b>ureteric bud morphogenesis</b>                | 5, 6, 7       | 56  | 2 | 0.004 | 0.094 |
| GO:0048477 | <b>oogenesis</b>                                 | 5, 6          | 57  | 2 | 0.004 | 0.095 |

|            |                                                              |                |      |    |       |       |
|------------|--------------------------------------------------------------|----------------|------|----|-------|-------|
| GO:0007276 | <b>gamete generation</b>                                     | 3, 4           | 415  | 4  | 0.004 | 0.095 |
| GO:0002376 | immune system process                                        | 1              | 1383 | 7  | 0.004 | 0.104 |
| GO:0006921 | cellular component disassembly involved in apoptotic process | 5              | 68   | 2  | 0.005 | 0.106 |
| GO:0051707 | response to other organism                                   | 2, 3           | 460  | 4  | 0.006 | 0.107 |
| GO:0033077 | T cell differentiation in thymus                             | 6, 7, 8, 9, 10 | 71   | 2  | 0.006 | 0.110 |
| GO:0019953 | <b>sexual reproduction</b>                                   | 2              | 469  | 4  | 0.006 | 0.110 |
| GO:0072006 | nephron development                                          | 3, 5, 6, 7     | 73   | 2  | 0.006 | 0.112 |
| GO:0022037 | metencephalon development                                    | 3, 4, 6, 7, 8  | 74   | 2  | 0.006 | 0.113 |
| GO:0009607 | response to biotic stimulus                                  | 2              | 485  | 4  | 0.007 | 0.101 |
| GO:0042157 | lipoprotein metabolic process                                | 4              | 77   | 2  | 0.007 | 0.103 |
| GO:0032502 | developmental process                                        | 1              | 3808 | 12 | 0.007 | 0.106 |
| GO:0001656 | metanephros development                                      | 5, 6, 7        | 80   | 2  | 0.007 | 0.107 |
| GO:0016050 | vesicle organization                                         | 5              | 86   | 2  | 0.008 | 0.106 |
| GO:0007292 | <b>female gamete generation</b>                              | 4, 5           | 87   | 2  | 0.009 | 0.107 |
| GO:0008543 | fibroblast growth factor receptor signaling pathway          | 5, 6, 7, 8     | 89   | 2  | 0.009 | 0.111 |
| GO:0001657 | <b>ureteric bud development</b>                              | 4              | 90   | 2  | 0.009 | 0.112 |
| GO:0008584 | <b>male gonad development</b>                                | 5, 6, 7        | 91   | 2  | 0.009 | 0.113 |

**Hypo DM promoters in WL (9 homologs found of 16 loci included)**

|            |                                                        |               |      |   |       |              |
|------------|--------------------------------------------------------|---------------|------|---|-------|--------------|
| GO:0018345 | protein palmitoylation                                 | 7             | 10   | 2 | 0.000 | <b>0.010</b> |
| GO:0006497 | protein lipidation                                     | 6             | 46   | 2 | 0.000 | 0.108        |
| GO:0042158 | lipoprotein biosynthetic process                       | 5             | 50   | 2 | 0.000 | 0.085        |
| GO:0042157 | lipoprotein metabolic process                          | 4             | 77   | 2 | 0.001 | <b>0.035</b> |
| GO:0008543 | fibroblast growth factor receptor signaling pathway    | 5, 6, 7, 8    | 89   | 2 | 0.001 | <b>0.032</b> |
| GO:0044344 | cellular response to fibroblast growth factor stimulus | 4, 6          | 105  | 2 | 0.002 | <b>0.042</b> |
| GO:0071774 | response to fibroblast growth factor stimulus          | 3, 5          | 105  | 2 | 0.002 | <b>0.041</b> |
| GO:0043543 | protein acylation                                      | 6             | 123  | 2 | 0.003 | <b>0.040</b> |
| GO:0007281 | germ cell development                                  | 3, 4, 5       | 133  | 2 | 0.003 | <b>0.045</b> |
| GO:0009615 | response to virus                                      | 3, 4          | 200  | 2 | 0.007 | 0.057        |
| GO:0071363 | cellular response to growth factor stimulus            | 5             | 212  | 2 | 0.008 | 0.057        |
| GO:0070848 | response to growth factor stimulus                     | 4             | 226  | 2 | 0.008 | 0.058        |
| GO:0008219 | cell death                                             | 2             | 1548 | 4 | 0.011 | 0.067        |
| GO:0016265 | death                                                  | 1             | 1551 | 4 | 0.011 | 0.067        |
| GO:0071310 | cellular response to organic substance                 | 4             | 848  | 3 | 0.013 | 0.072        |
| GO:0051704 | multi-organism process                                 | 1             | 870  | 3 | 0.014 | 0.073        |
| GO:0016044 | cellular membrane organization                         | 2, 4          | 320  | 2 | 0.016 | 0.081        |
| GO:0061024 | membrane organization                                  | 3             | 322  | 2 | 0.016 | 0.081        |
| GO:0003006 | developmental process involved in reproduction         | 2, 3          | 402  | 2 | 0.025 | 0.100        |
| GO:0007276 | gamete generation                                      | 3, 4          | 415  | 2 | 0.026 | 0.101        |
| GO:0070887 | cellular response to chemical stimulus                 | 3             | 1150 | 3 | 0.028 | 0.108        |
| GO:0045087 | innate immune response                                 | 3, 4          | 441  | 2 | 0.029 | 0.108        |
| GO:0051707 | response to other organism                             | 2, 3          | 460  | 2 | 0.031 | 0.110        |
| GO:0019953 | sexual reproduction                                    | 2             | 469  | 2 | 0.032 | 0.111        |
| GO:0006184 | GTP catabolic process                                  | 9, 10, 11, 12 | 470  | 2 | 0.032 | 0.111        |
| GO:0046039 | GTP metabolic process                                  | 8, 9, 10, 11  | 482  | 2 | 0.034 | 0.115        |
| GO:0009607 | response to biotic stimulus                            | 2             | 485  | 2 | 0.034 | 0.113        |
| GO:0071495 | cellular response to endogenous stimulus               | 3             | 487  | 2 | 0.035 | 0.114        |
| GO:0007166 | cell surface receptor signaling pathway                | 3, 4, 5       | 2224 | 4 | 0.035 | 0.112        |
| GO:0048610 | cellular process involved in reproduction              | 2, 3          | 496  | 2 | 0.036 | 0.114        |

**Hyper DM promoters in WL (15 homologs found of 23 loci included)**

|            |                                                           |               |      |    |       |       |
|------------|-----------------------------------------------------------|---------------|------|----|-------|-------|
| GO:0022037 | metencephalon development                                 | 3, 4, 6, 7, 8 | 74   | 2  | 0.002 | 0.178 |
| GO:0001701 | in utero embryonic development                            | 6             | 308  | 3  | 0.003 | 0.191 |
| GO:0016050 | vesicle organization                                      | 5             | 86   | 2  | 0.003 | 0.183 |
| GO:0032501 | multicellular organismal process                          | 1             | 4702 | 10 | 0.004 | 0.202 |
| GO:0030902 | hindbrain development                                     | 3, 5, 6, 7    | 112  | 2  | 0.005 | 0.165 |
| GO:0051607 | defense response to virus                                 | 3, 4, 5       | 120  | 2  | 0.006 | 0.156 |
| GO:0007275 | multicellular organismal development                      | 2             | 3449 | 8  | 0.008 | 0.153 |
| GO:0042113 | B cell activation                                         | 4, 5          | 146  | 2  | 0.009 | 0.164 |
| GO:0043009 | chordate embryonic development                            | 5             | 499  | 3  | 0.011 | 0.164 |
| GO:0009792 | embryo development ending in birth or egg hatching        | 4             | 511  | 3  | 0.012 | 0.168 |
| GO:0032502 | developmental process                                     | 1             | 3808 | 8  | 0.014 | 0.174 |
| GO:0009615 | response to virus                                         | 3, 4          | 200  | 2  | 0.016 | 0.192 |
| GO:0001666 | response to hypoxia                                       | 3, 4          | 206  | 2  | 0.017 | 0.197 |
| GO:0070482 | response to oxygen levels                                 | 3             | 222  | 2  | 0.019 | 0.206 |
| GO:0034645 | cellular macromolecule biosynthetic process               | 4             | 3279 | 7  | 0.021 | 0.201 |
| GO:0044249 | cellular biosynthetic process                             | 3             | 4123 | 8  | 0.022 | 0.199 |
| GO:2000112 | regulation of cellular macromolecule biosynthetic process | 5, 6          | 2556 | 6  | 0.023 | 0.203 |
| GO:0009059 | macromolecule biosynthetic process                        | 3             | 3354 | 7  | 0.024 | 0.196 |
| GO:0009058 | biosynthetic process                                      | 2             | 4217 | 8  | 0.025 | 0.194 |
| GO:0010556 | regulation of macromolecule biosynthetic process          | 4, 5          | 2615 | 6  | 0.025 | 0.195 |
| GO:0010467 | gene expression                                           | 3             | 3426 | 7  | 0.026 | 0.199 |
| GO:0010468 | regulation of gene expression                             | 4, 5          | 2700 | 6  | 0.029 | 0.189 |
| GO:0090304 | nucleic acid metabolic process                            | 4, 5          | 3542 | 7  | 0.031 | 0.192 |
| GO:0006139 | nucleobase-containing compound metabolic process          | 3, 4          | 4432 | 8  | 0.032 | 0.196 |
| GO:0031326 | regulation of cellular biosynthetic process               | 4, 5          | 2785 | 6  | 0.033 | 0.197 |
| GO:0009889 | regulation of biosynthetic process                        | 3, 4          | 2809 | 6  | 0.034 | 0.201 |
| GO:0002376 | immune system process                                     | 1             | 1383 | 4  | 0.035 | 0.200 |
| GO:0016044 | cellular membrane organization                            | 2, 4          | 320  | 2  | 0.037 | 0.202 |
| GO:0061024 | membrane organization                                     | 3             | 322  | 2  | 0.037 | 0.203 |
| GO:0009790 | embryo development                                        | 3             | 854  | 3  | 0.042 | 0.208 |

Analysis was performed with human homologs using the Manteia web tool.

Note: Each promoter can represent more than one gene.

\* Only 6 GO terms were found
