# Supplementary material for: Large Sex Differences in Chicken Behavior and Brain Gene Expression Coincide with Few Differences in Promoter DNA-Methylation
Source: PubMed Central journal article supplement (PMC4004567; doi:10.1371/journal.pone.0096376), 2014-04-29
Supplement: pone.0096376.s006.pdf [file pone.0096376.s006.pdf]

**Table S5.** Mean values of the behaviour variables recorded in each of the behavioural tests.

|                                                  | Females |         | Males  |        | p-value      |
|--------------------------------------------------|---------|---------|--------|--------|--------------|
|                                                  | Mean    | SEM     | Mean   | SEM    | Sex          |
| <b><i>Social Reinstatement 3W (SR)</i></b>       |         |         |        |        |              |
| duration social zone (s)                         | 107.8   | ± 7.1   | 110.5  | ± 6.8  | 0.693        |
| latency enter social zone (s)                    | 35.0    | ± 4.5   | 29.0   | ± 3.6  | 0.538        |
| mean distance moved (cm)                         | 1543.4  | ± 52.3  | 1551.2 | ± 46.9 | 0.862        |
| <b><i>Open Field 4W (OF4)</i></b>                |         |         |        |        |              |
| frequency center (per minute)                    | 3.8     | ± 0.2   | 4.5    | ± 0.2  | <b>0.030</b> |
| duration center (s)                              | 125.0   | ± 4.3   | 135.9  | ± 4.0  | 0.088        |
| latency center zone (s)                          | 55.7    | ± 4.3   | 45.7   | ± 3.7  | <b>0.024</b> |
| crossed zones (per minute)                       | 16.5    | ± 0.8   | 16.5   | ± 0.7  | 0.428        |
| distance moved (cm)                              | 2678.6  | ± 106.7 | 2899.3 | ± 98.8 | 0.066        |
| frequency corner (per minute)                    | 3.1     | ± 0.2   | 3.0    | ± 0.2  | 0.909        |
| duration corner (s)                              | 75.4    | ± 3.4   | 65.8   | ± 3.4  | <b>0.016</b> |
| frequency edges (per minute)                     | 6.9     | ± 0.3   | 7.4    | ± 0.3  | 0.133        |
| duration edges (s)                               | 97.9    | ± 3.0   | 97.0   | ± 2.8  | 0.804        |
| <b><i>Foraging/Exploration test 13w (FE)</i></b> |         |         |        |        |              |
| Familiar food (% of picks)                       | 53.6    | ± 2.2   | 74.8   | ± 2.1  | <b>0.000</b> |
| Saw dust (% of picks)                            | 16.4    | ± 1.0   | 11.2   | ± 0.9  | <b>0.000</b> |
| Hidden food (% of picks)                         | 30.0    | ± 1.9   | 15.7   | ± 1.3  | <b>0.000</b> |
| <b><i>Aerial predator 15w (AP)</i></b>           |         |         |        |        |              |
| Explore (% of observations)                      | 17.1    | ± 1.5   | 18.4   | ± 1.7  | 0.895        |
| Groundpeck (% of observations)                   | 6.0     | ± 0.9   | 7.2    | ± 1.2  | 0.779        |
| Preening (% of observations)                     | 1.4     | ± 0.3   | 2.8    | ± 0.5  | <b>0.022</b> |
| Voc (% of observations)                          | 56.6    | ± 2.8   | 44.2   | ± 2.6  | <b>0.002</b> |
| Stand alert (% of observations)                  | 65.3    | ± 2.6   | 66.3   | ± 2.5  | 0.368        |
| Walk Alert (% of observations)                   | 58.2    | ± 3.0   | 50.0   | ± 3.0  | 0.177        |
| Freeze (% of observations)                       | 12.7    | ± 2.4   | 11.6   | ± 2.2  | 0.412        |
| Esc. Att. (% of observations)                    | 1.8     | ± 0.3   | 0.7    | ± 0.2  | <b>0.000</b> |
| <b><i>Open field 16w (OF16)</i></b>              |         |         |        |        |              |
| Crossed zones (per minute)                       | 2.7     | ± 0.3   | 3.3    | ± 0.3  | 0.062        |
| Frequency edges (per minute)                     | 1.1     | ± 0.1   | 1.4    | ± 0.1  | 0.095        |
| Frequency center (per minute)                    | 1.6     | ± 0.2   | 1.9    | ± 0.2  | 0.072        |
| <b><i>Tonic Immobility 17w (TI)</i></b>          |         |         |        |        |              |
| Ind attempts (nmb)                               | 2.4     | ± 0.1   | 1.8    | ± 0.1  | <b>0.001</b> |
| First movment (s)                                | 191.2   | ± 21.5  | 128.5  | ± 17.1 | 0.065        |
| Rigthening (s)                                   | 358.0   | ± 20.0  | 299.2  | ± 19.5 | <b>0.015</b> |
| <b><i>Undisturbed behaviour 27w (UB)</i></b>     |         |         |        |        |              |
| Feeding (% of observations)                      | 10.8    | ± 0.8   | 8.1    | ± 0.8  | 0.099        |
| Explore (% of observations)                      | 35.4    | ± 2.2   | 19.9   | ± 1.8  | <b>0.000</b> |
| Active (% of observations)                       | 80.9    | ± 3.9   | 42.5   | ± 3.4  | <b>0.000</b> |
| Perch (% of observations)                        | 2.0     | ± 0.6   | 16.2   | ± 1.6  | <b>0.000</b> |
| Comfort (% of observations)                      | 10.6    | ± 1.1   | 34.0   | ± 2.4  | <b>0.000</b> |

|                                  |     |   |     |     |   |     |              |
|----------------------------------|-----|---|-----|-----|---|-----|--------------|
| Jump/flight (% of observations)  | 5.8 | ± | 0.9 | 9.0 | ± | 1.1 | <b>0.000</b> |
| Social pecks(% of observations)  | 1.2 | ± | 0.2 | 0.7 | ± | 0.1 | 0.939        |
| Aggressive (% of observations)   | 1.2 | ± | 0.1 | 1.2 | ± | 0.2 | 0.530        |
| observations)                    | 1.5 | ± | 0.1 | 1.1 | ± | 0.2 | 0.052        |
| Other Social (% of observations) | 0.5 | ± | 0.2 | 0.2 | ± | 0.0 | 0.938        |

---
