# Supplementary material for: Large Sex Differences in Chicken Behavior and Brain Gene Expression Coincide with Few Differences in Promoter DNA-Methylation
Source: PubMed Central journal article supplement (PMC4004567; doi:10.1371/journal.pone.0096376), 2014-04-29
Supplement: pone.0096376.s007.pdf [file pone.0096376.s007.pdf]

**Table S6 - Primers used in qPCR and bisulfite sequencing**

| Oligonucleotide sequence      | Type        | Target                                              | 5' modification |
|-------------------------------|-------------|-----------------------------------------------------|-----------------|
| <b>Biseq</b>                  |             |                                                     |                 |
| GGGTATTATTTAGTTTGTGAGTGT      | PCR-Forward | ZFR chromosome 1 promoter                           | Biotinylated    |
| AAAAACTATTCCCATAAATCCAACAC    | PCR-Reverse | ZFR chromosome 1 promoter                           | None            |
| CCCATAAATCCAACACC             | Sequencing  | ZFR chromosome 1 promoter                           | None            |
| GTGGAAAGGTATAGATAATTAAGGGTAGT | PCR-Forward | MHM within predicted 2nd exon                       | Biotinylated    |
| CCCTTATTCTTACAATACTCTACCATCAC | PCR-Reverse | MHM within predicted 2nd exon                       | None            |
| CCTAAATATAATAAATACTTTTTCC     | Sequencing  | MHM within predicted 2nd exon                       | None            |
| ATGATGTTGATGTGGTTATAGTTG      | PCR-Forward | MHM Upstream promoter within repeat                 | None            |
| TCCAATACTTCATCCATAACACTTT     | PCR-Reverse | MHM Upstream promoter within repeat                 | Biotinylated    |
| GTTATTTTTTTTAGTTATTAGATGG     | Sequencing  | MHM Upstream promoter within repeat                 | None            |
| <b>qPCR</b>                   |             |                                                     |                 |
| CTATCAACAGCCGACAGCAA          | PCR-Forward | ZFR chromosome 1 exon 2-3                           | None            |
| GCTGGGCTTGGGTATATTGA          | PCR-Reverse | ZFR chromosome 1 exon 2-3                           | None            |
| GGAGCCAAGCATCAGAAAGT          | PCR-Forward | ZFR chromosome Z exon 7-8                           | None            |
| GTTTGCCGTGGGAGTAAGAA          | PCR-Reverse | ZFR chromosome Z exon 7-8                           | None            |
| CGCTGCCATCTGGTAACTGG          | PCR-Forward | MHM novel gene predicted exon 2-3                   | None            |
| CCTGGAAAGAAAAGCACTTGGGA       | PCR-Reverse | MHM novel gene predicted exon 2-3                   | None            |
| AACTCTCCGCCTGCCCTTT           | PCR-Forward | First EST downstream MHM novel gene                 | None            |
| CCAGAGGTGTGGTCTGTGG           | PCR-Reverse | First EST downstream MHM novel gene                 | None            |
| TGTCAAACCAGCCGTTTCC           | PCR-Forward | Intronic EST between exon 1 and 2 of MHM novel gene | None            |
| TCCACCCTCTCTCCCACT            | PCR-Reverse | Intronic EST between exon 1 and 2 of MHM novel gene | None            |
